# Supplementary material
Source: publisher site journal article supplement (https://www.dovepress.com/article/254856)
Supplement: Supplementary file 1 [file get_supplementary_file.php]

**Supplementary Material**

1H-NMR for **S1 2**

1H-NMR and 13C-NMR spectra for **2 3**

LC/ESI-MS analysis for **2 4**

1H-NMR and 13C-NMR spectra for **3 5**

LC/ESI-MS analysis for **3 6**

1H-NMR and 13C-NMR spectra for **4 7**

LC/ESI-MS analysis for **4 8**

1H-NMR and 13C-NMR spectra for **5 9**

LC/ESI-MS analysis for **5 10**

1H-NMR and 13C-NMR spectra for **KA39 11**

LC/ESI-MS analysis for **KA39 12**

1H-NMR and 13C-NMR spectra for **KA26 13**

LC/ESI-MS analysis for **KA26 14**

1H-NMR and 13C-NMR spectra for **KA25 15**

LC/ESI-MS analysis for **KA25 16**


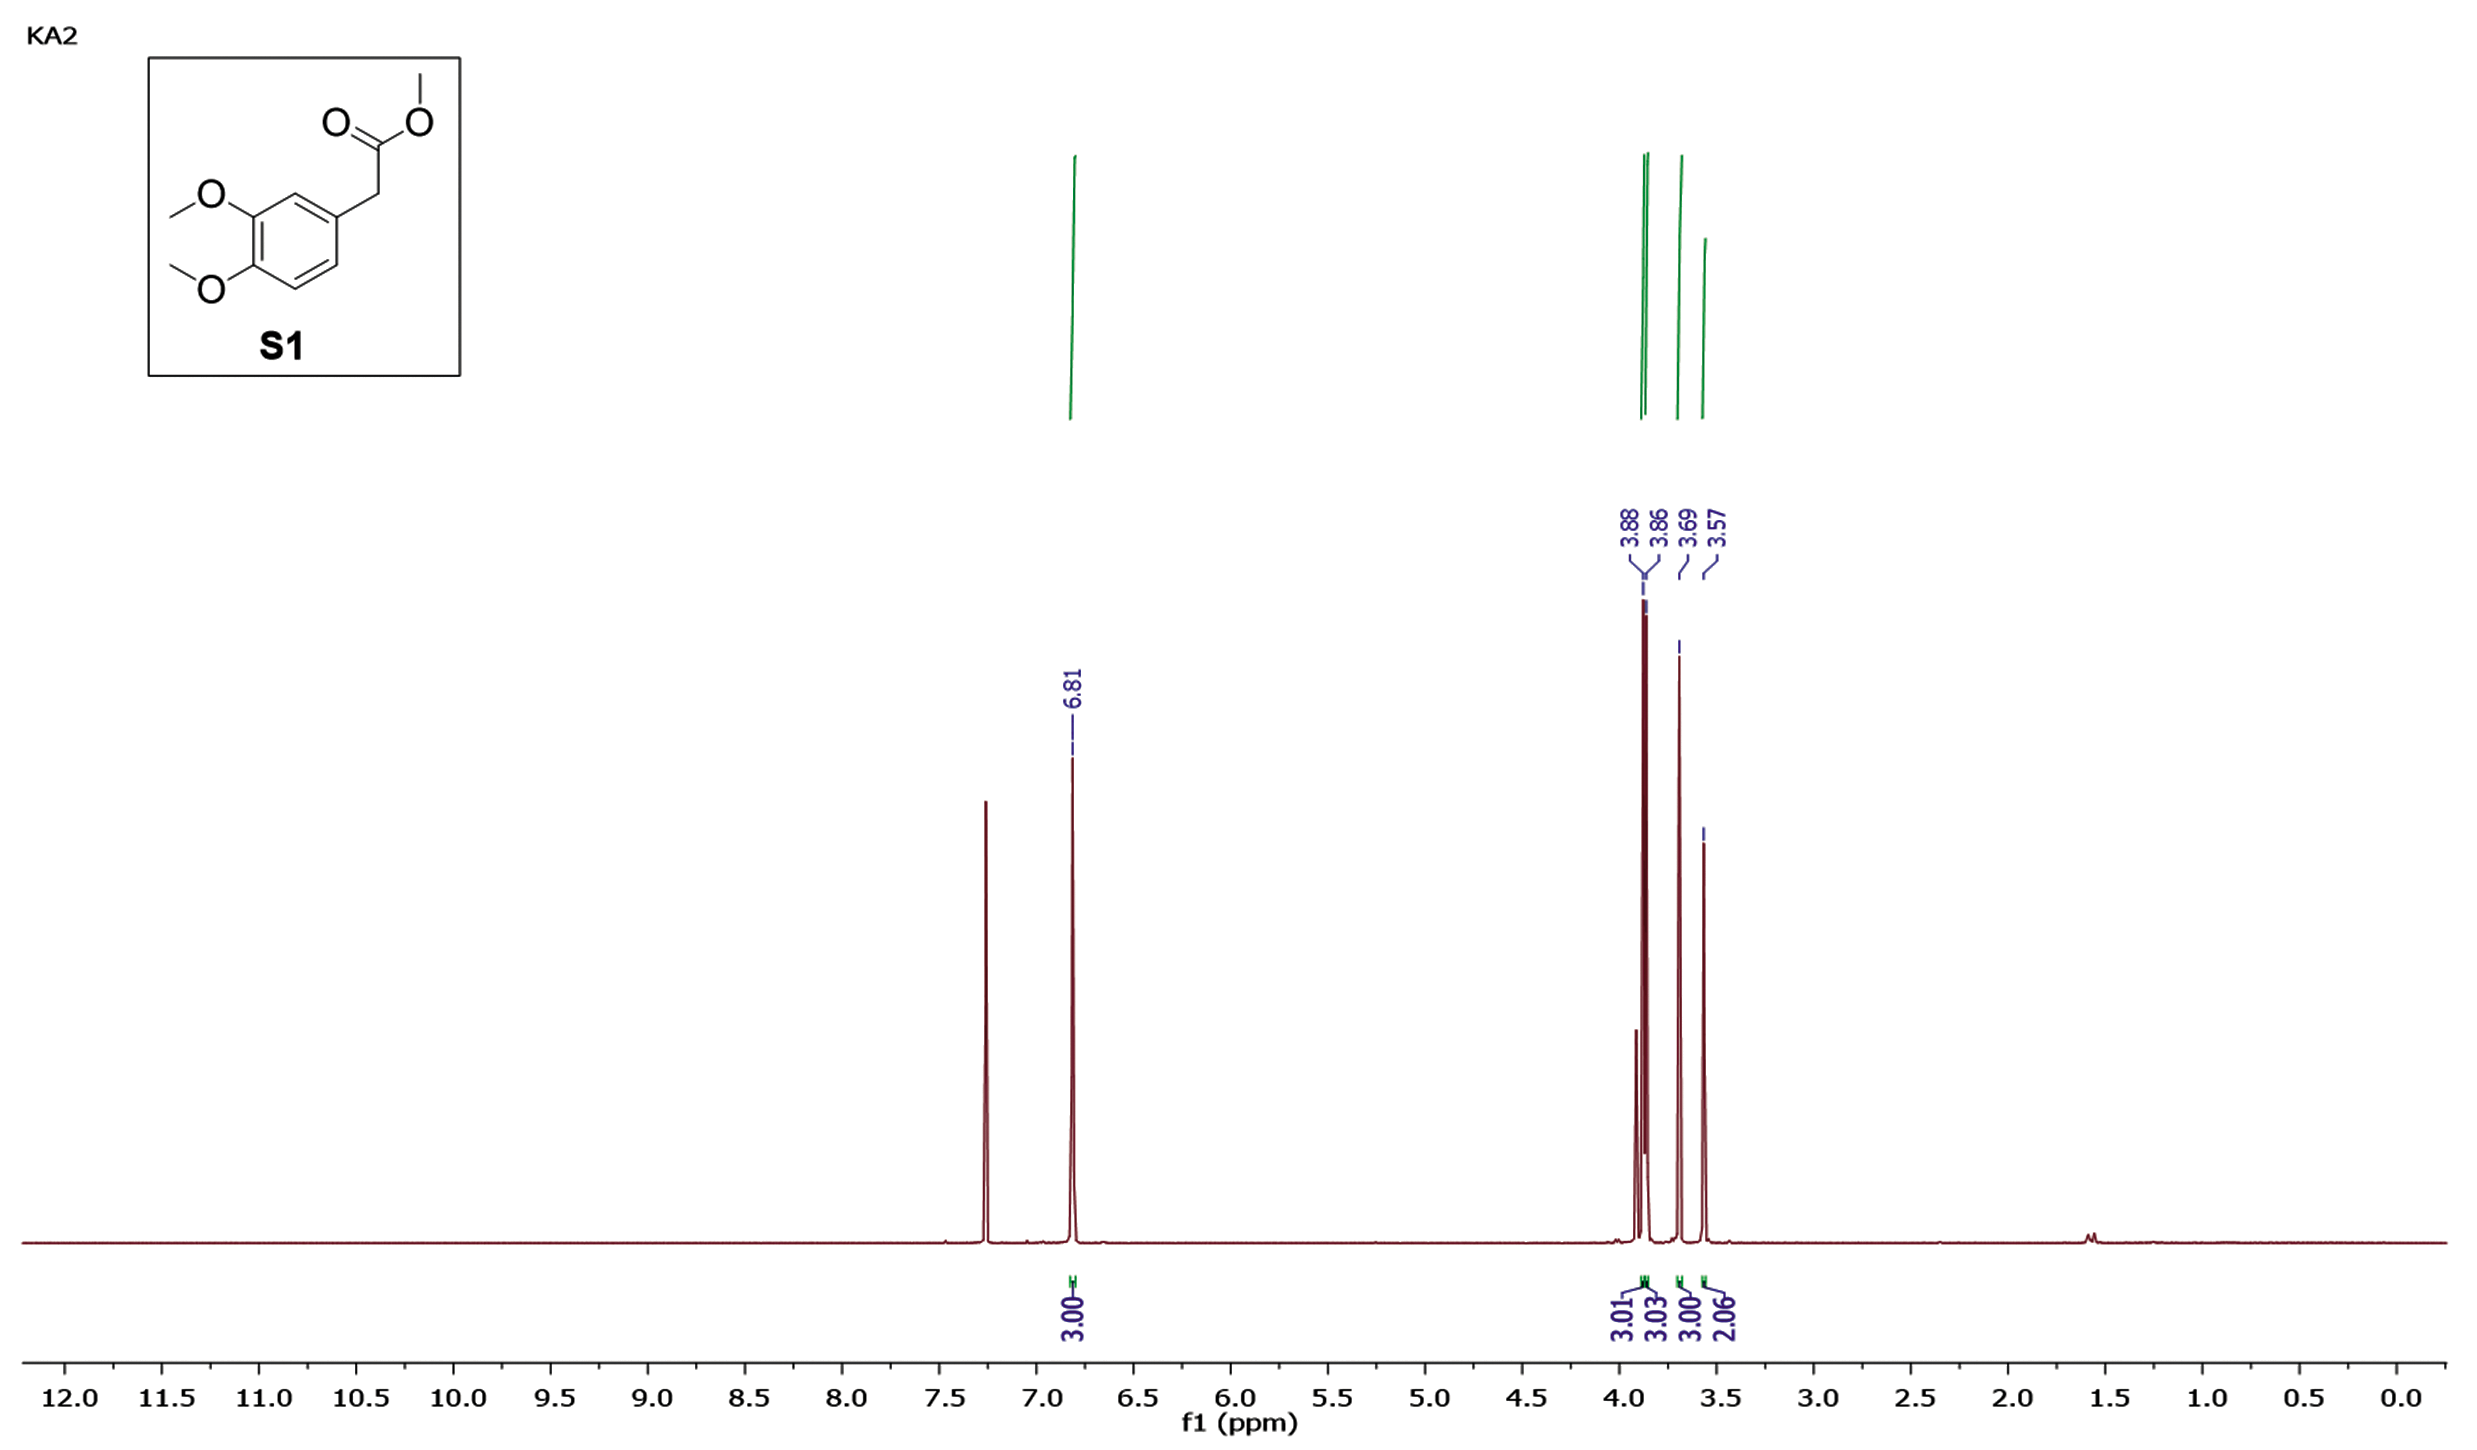


**Figure S1.** 1H-NMR forcompound **S1(1) .**


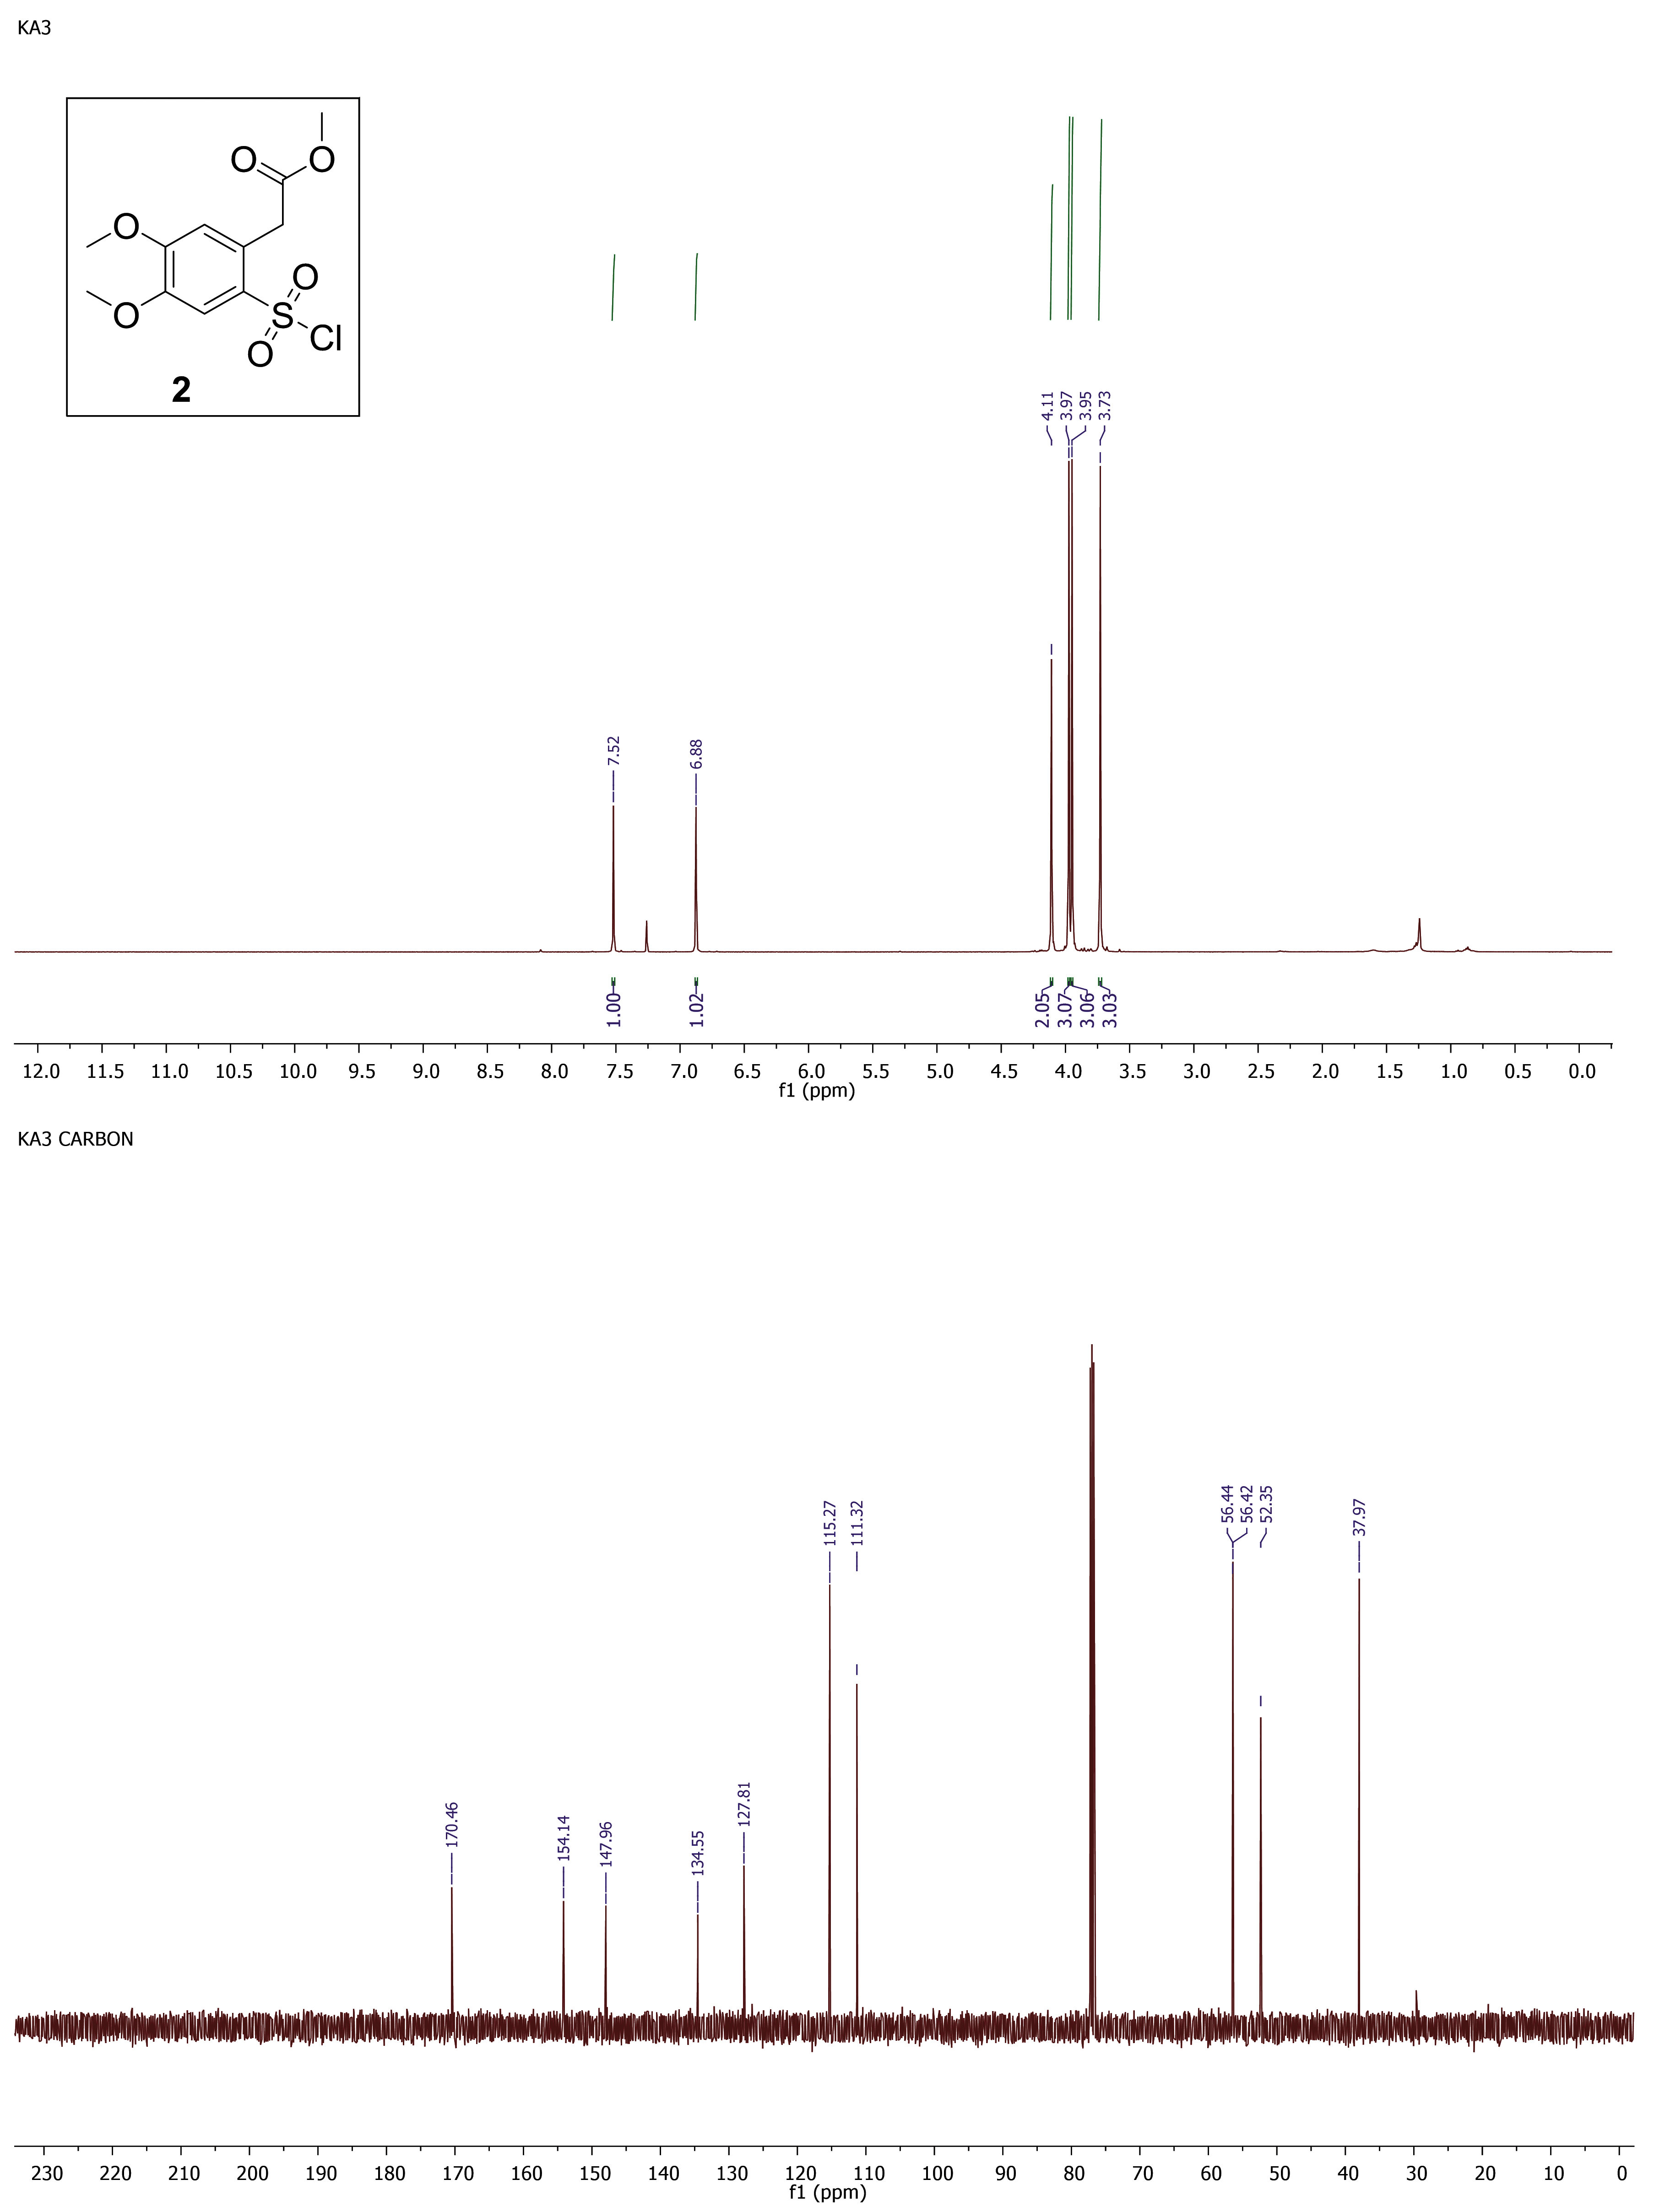


**Figure S2.** 1H-NMR and 13C-NMR spectra for compound **2.**


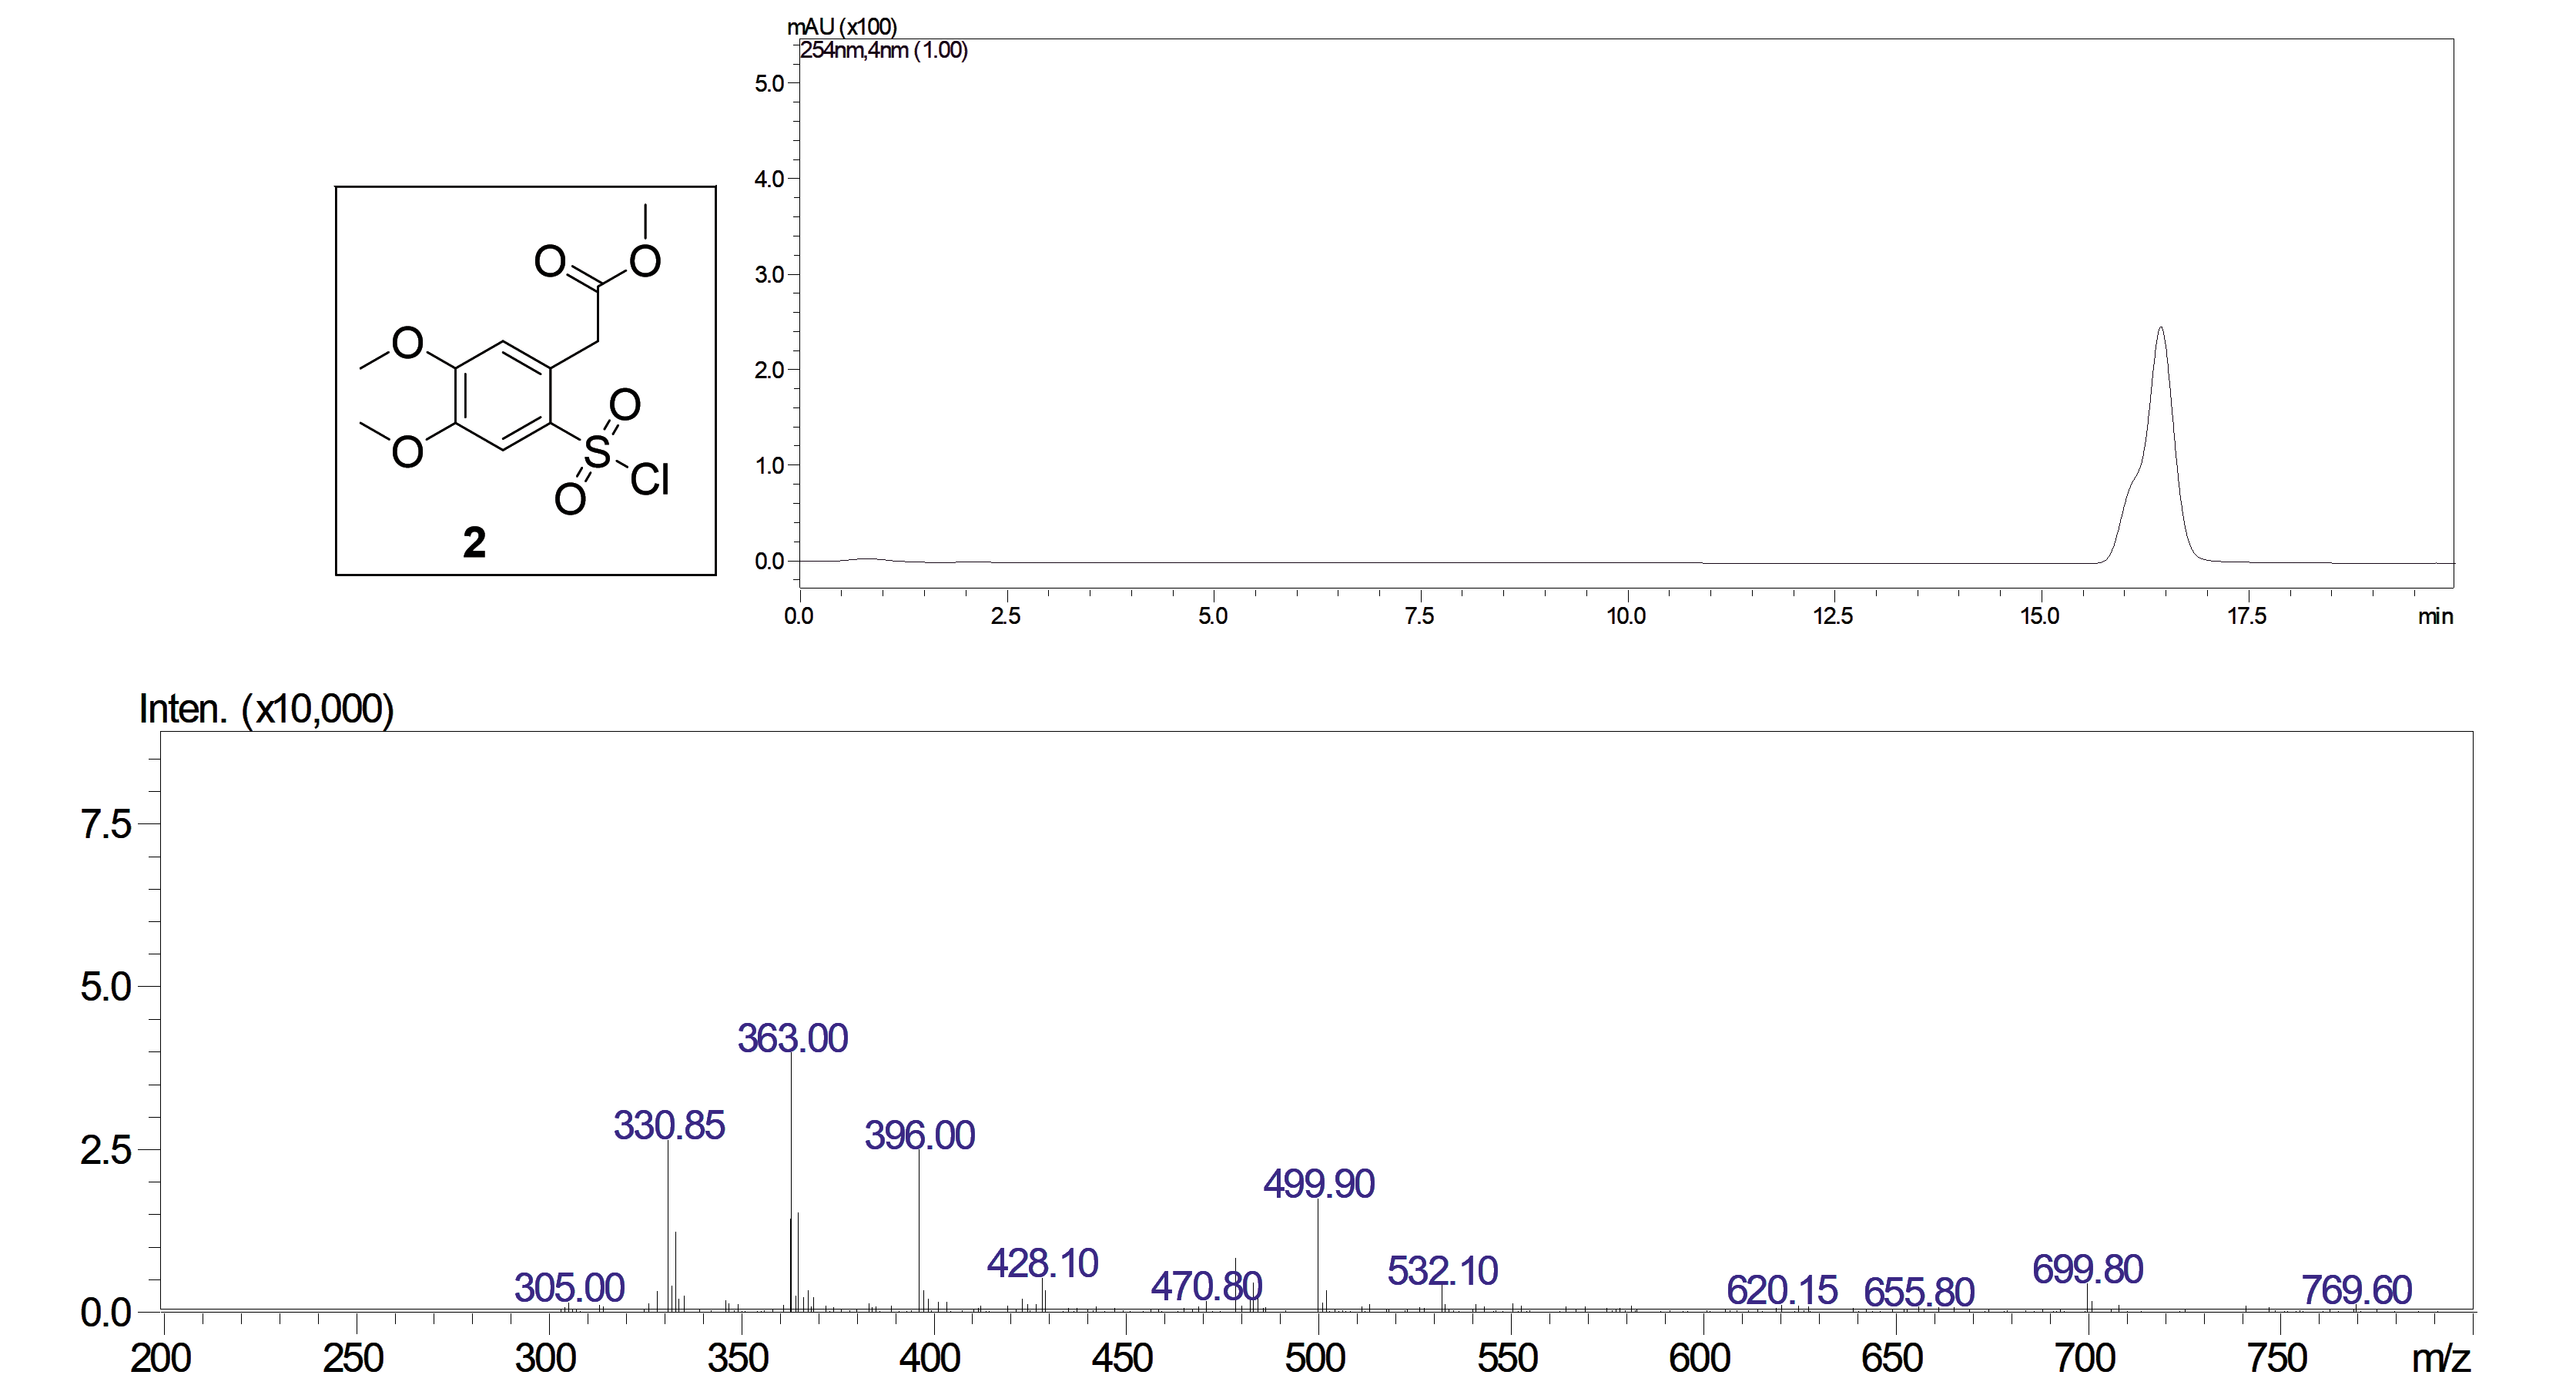


**Figure S3.** LC/ESI-MS analysis forcompound **2.** ESI-MS, positive mode: m/z calcd mass for C11H13ClNaO6S [M+Na]+= 331.0, was found 330.85. Analytical method for LC-MS: LC-20AD Shimadzu connected to Shimadzu LCMS-2010EV; Mobile Phase: methanol; LC isocratic; HPLC column: SUPELCO Discovery C18, 25cm x 4.6mm, 5μm; Flow rate: 0.4 mL/min; Column temperature: 26 °C; UV detector: 254 nm; MS detector: 1.65K; Run time: 20 min; Retention time: 16.5 min.


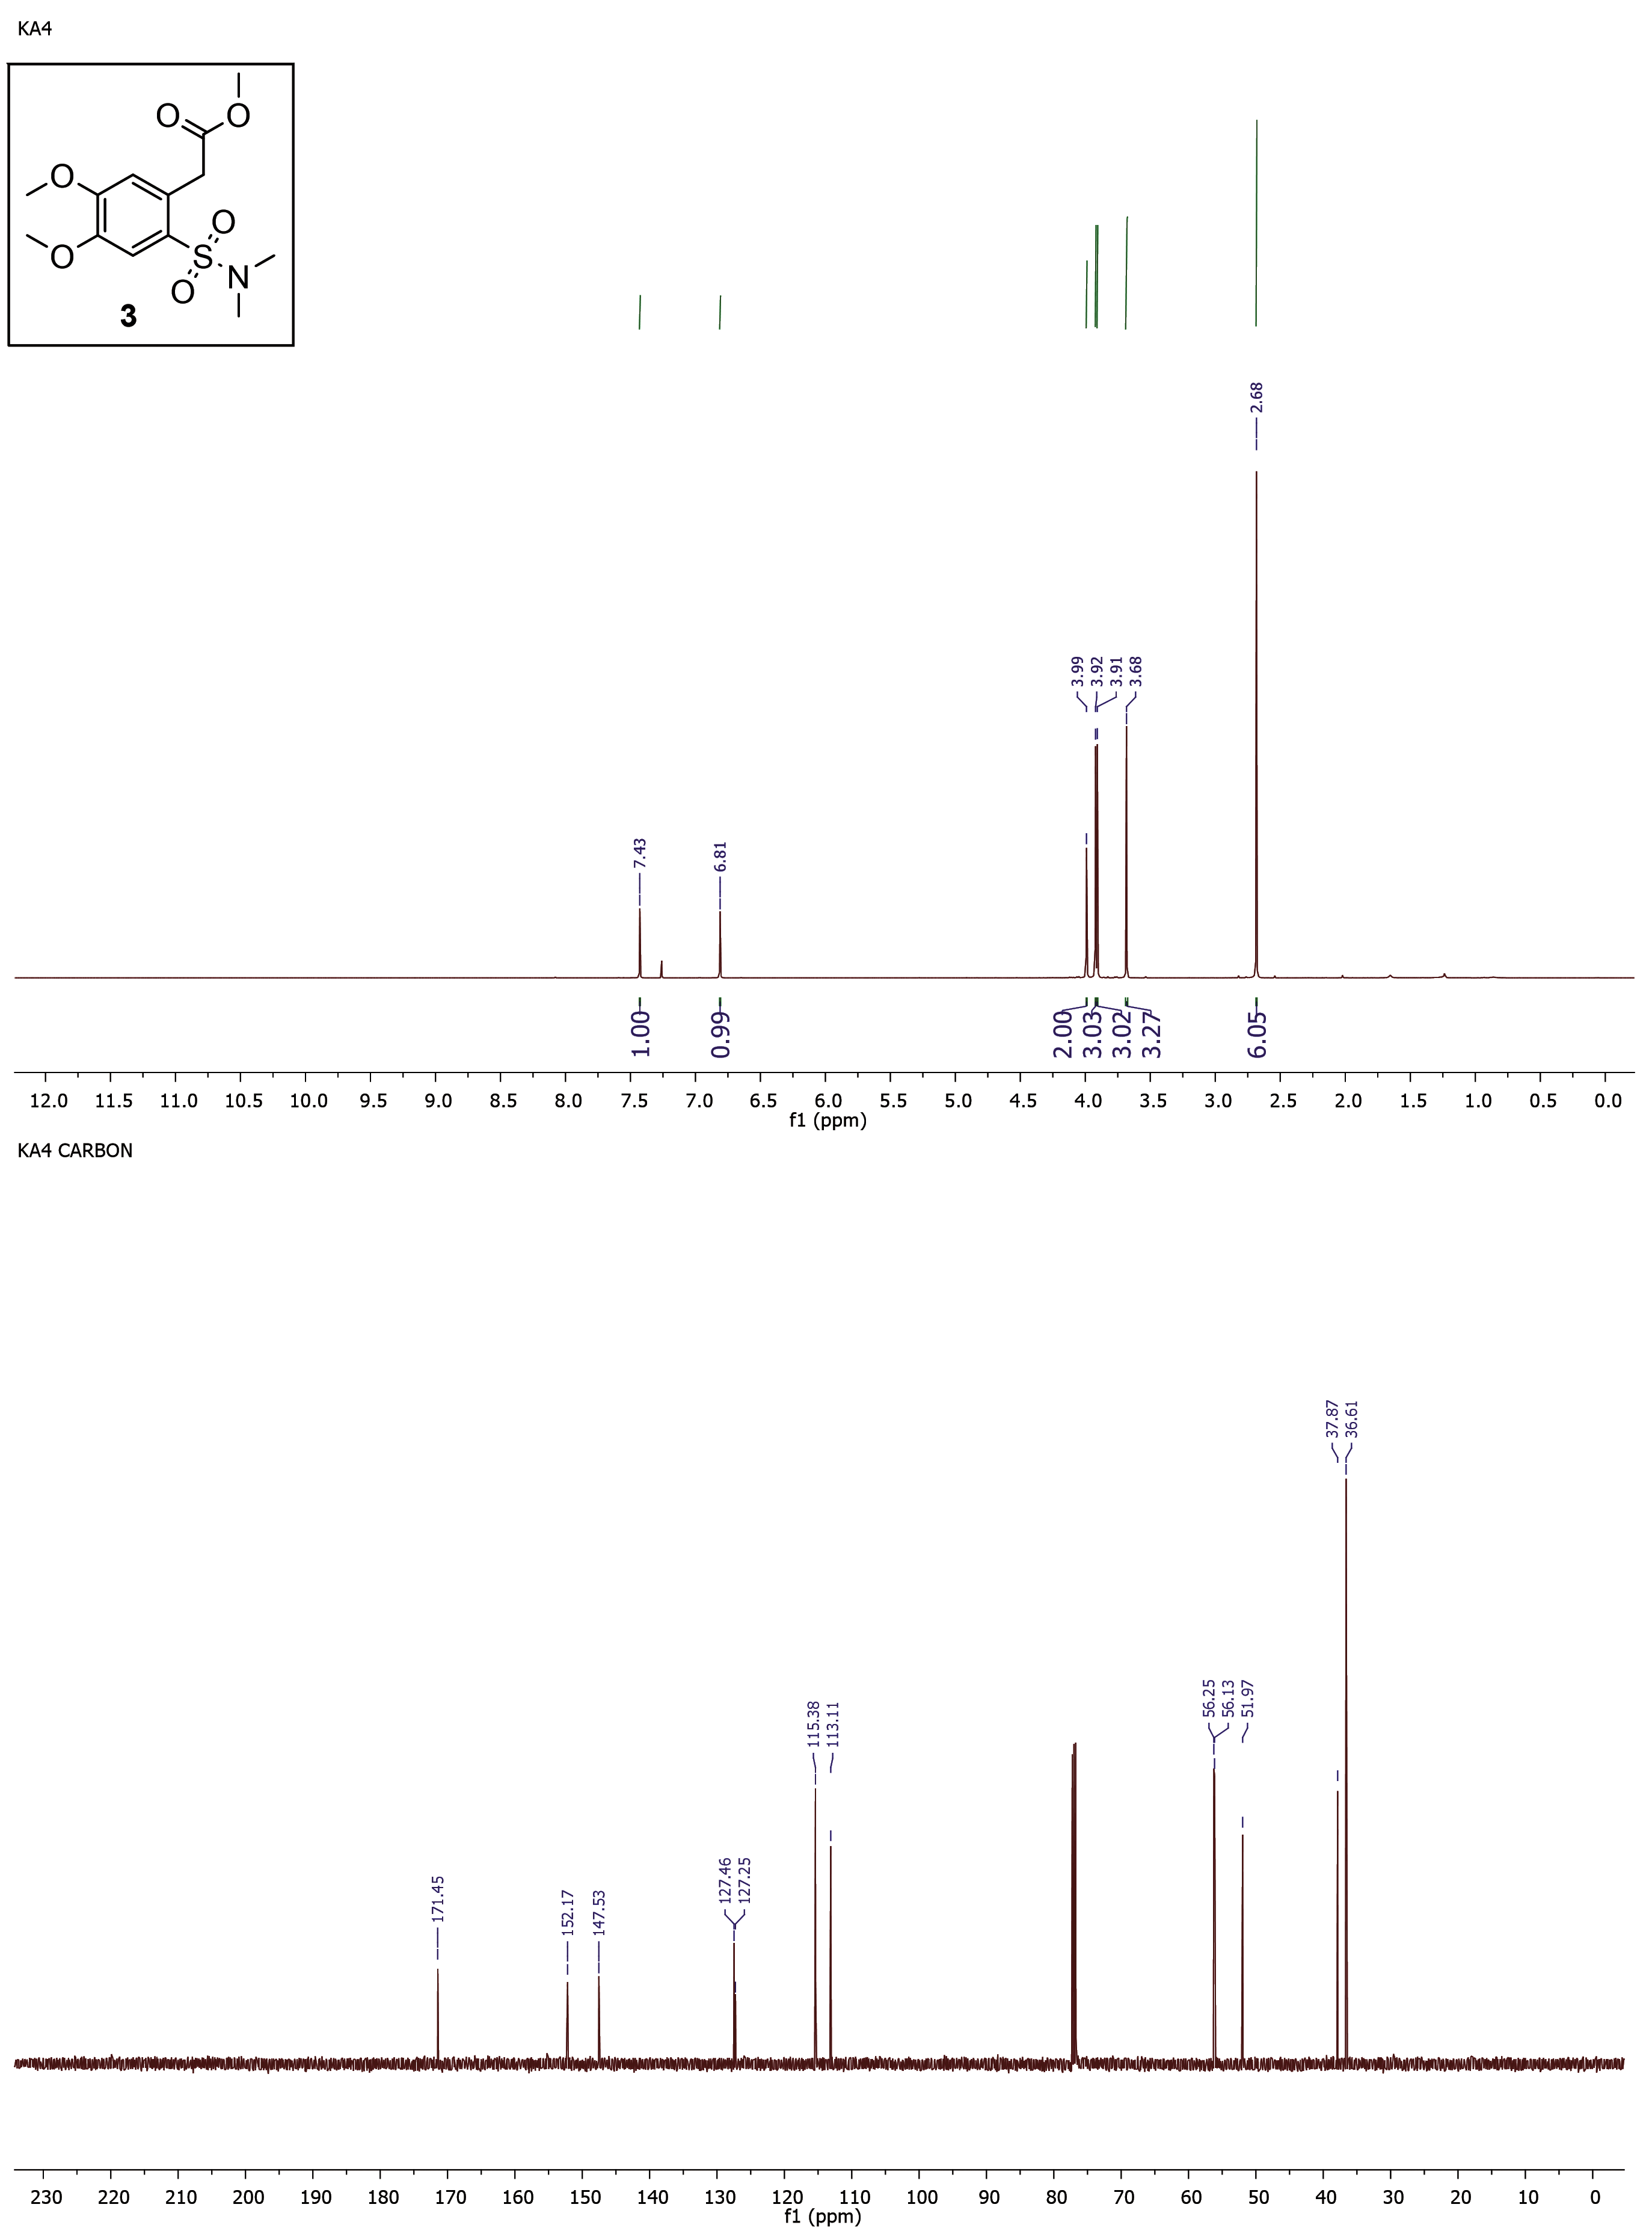


**Figure S4.** 1H-NMR and 13C-NMR spectra forcompound **3.**


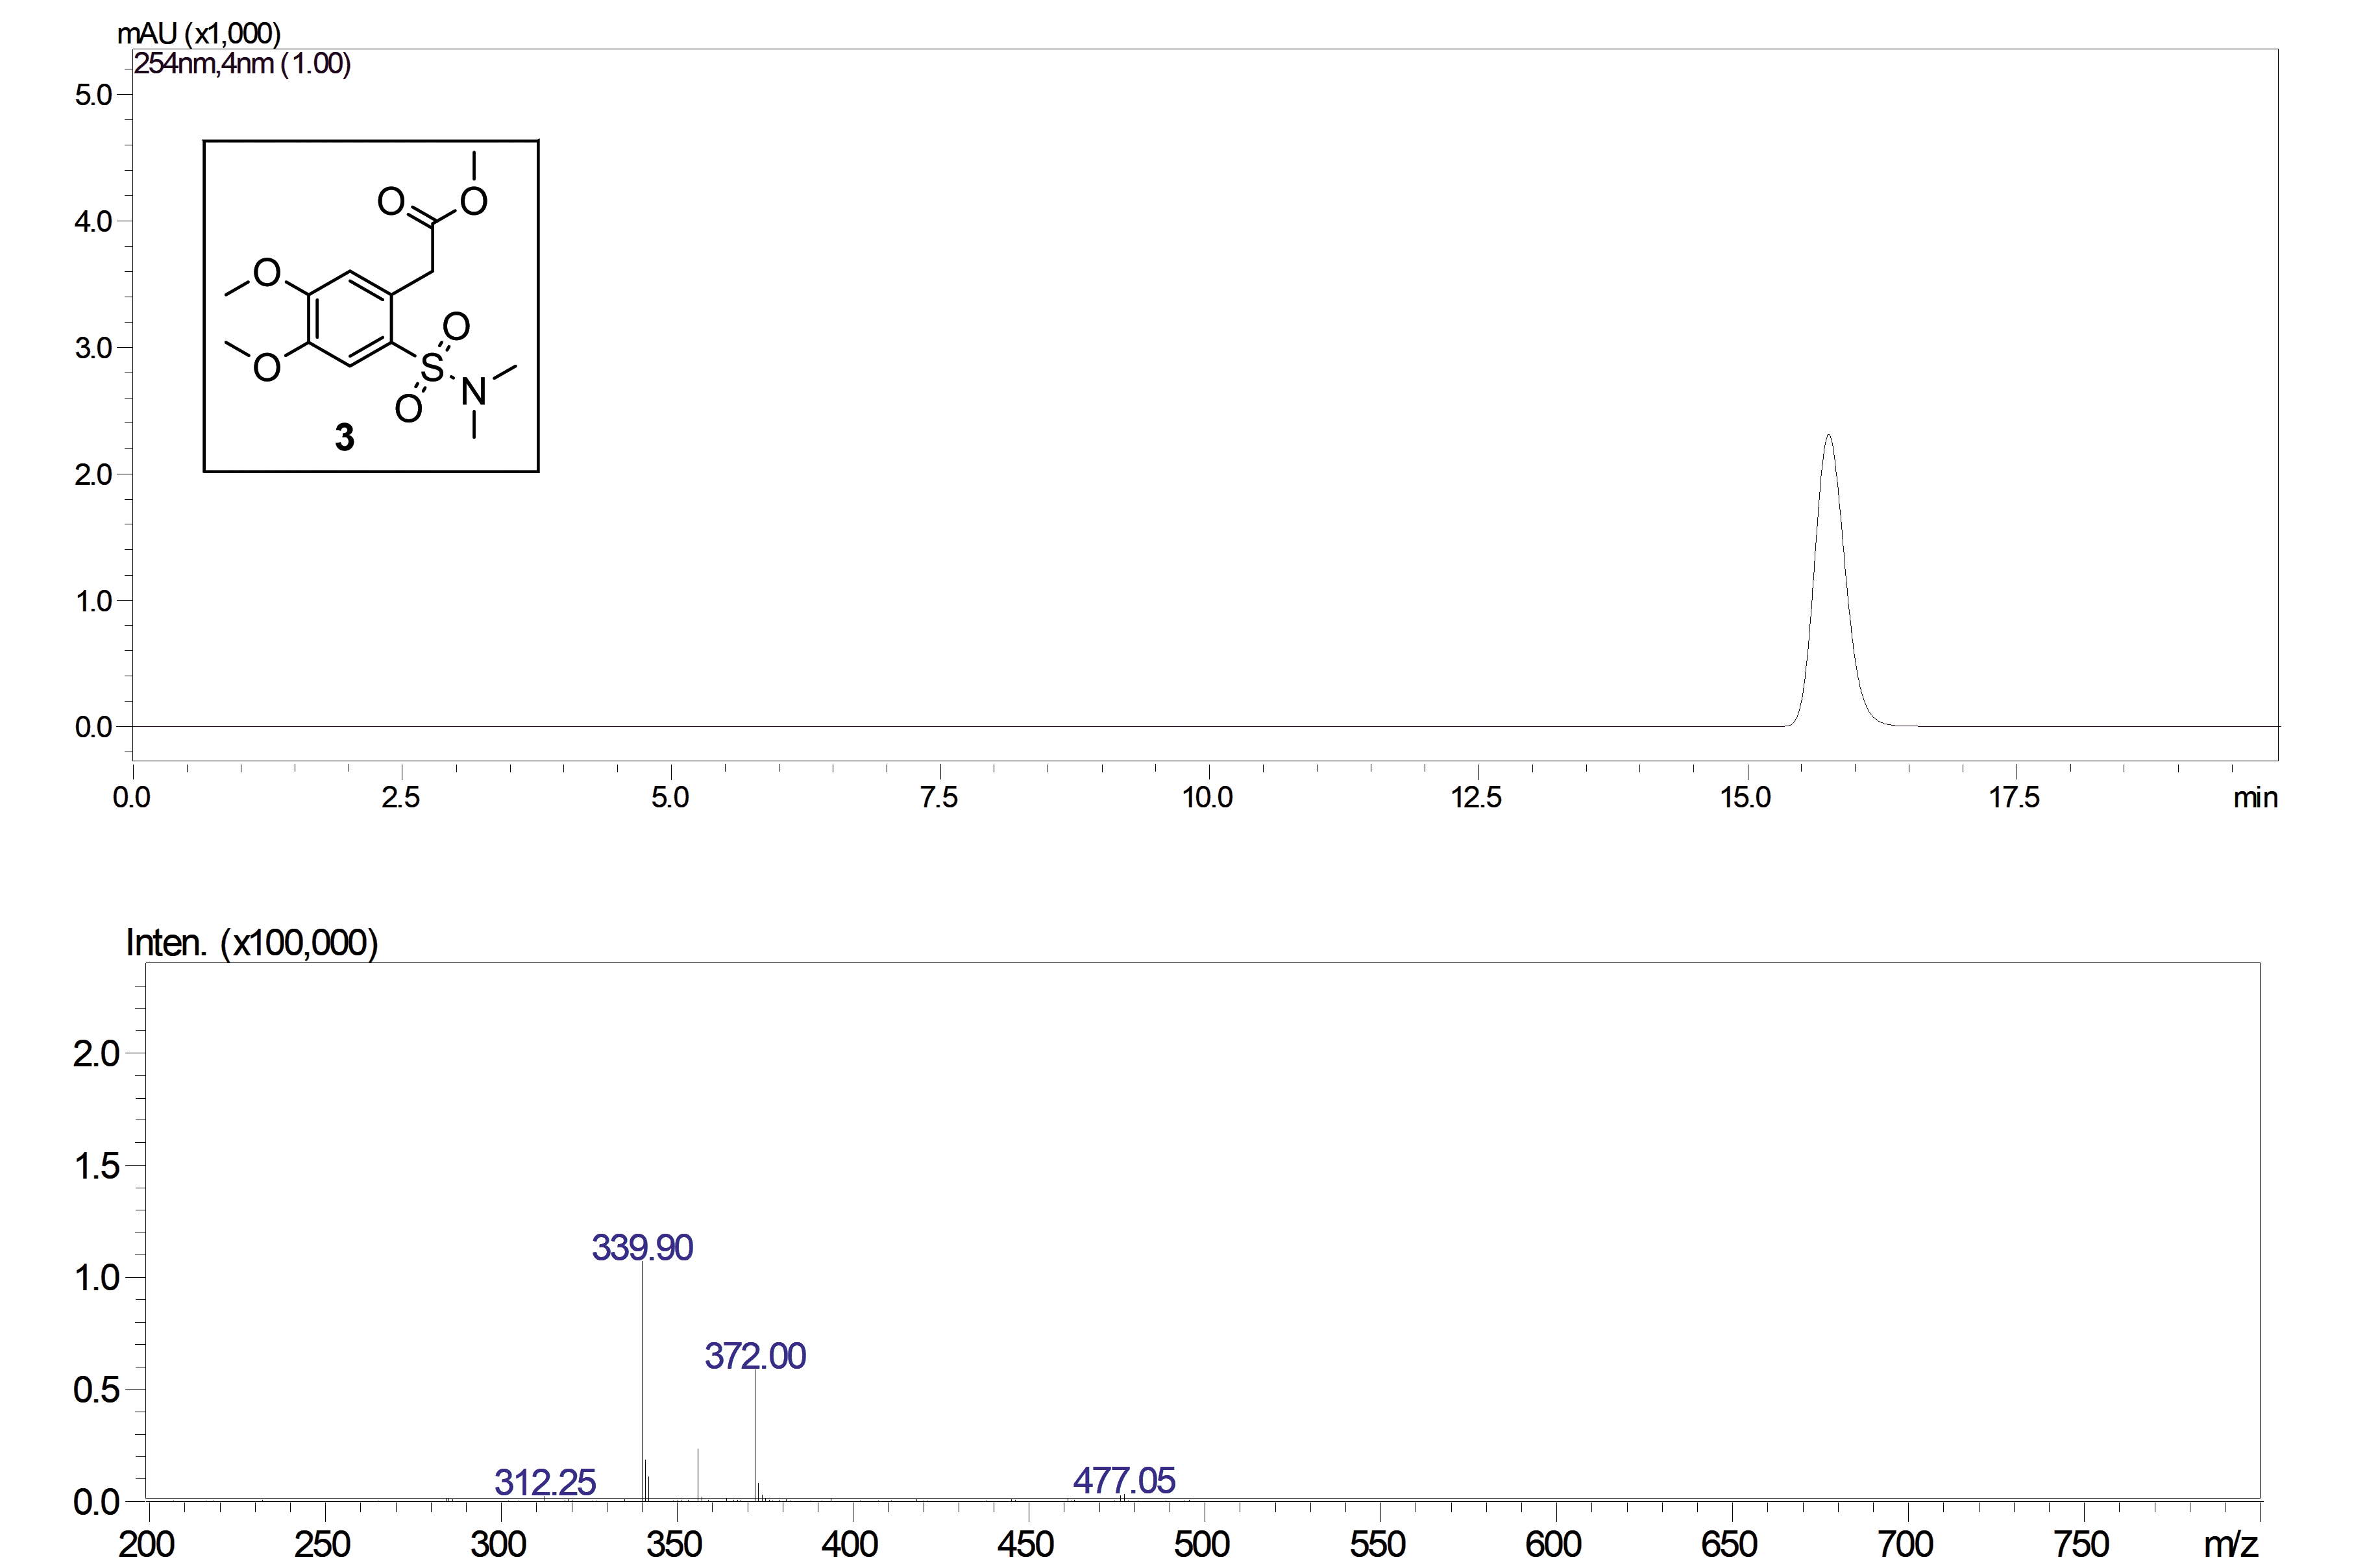


**Figure S5.** LC/ESI-MS analysis forcompound **3.** ESI-MS, positive mode: m/z calcd mass for C13H19NNaO6S [M+Na]+= 340.08, was found 339.90. Analytical method for LC-MS: LC-20AD Shimadzu connected to Shimadzu LCMS-2010EV; Mobile Phase: methanol; LC isocratic; HPLC column: SUPELCO Discovery C18, 25cm x 4.6mm, 5μm; Flow rate: 0.4 mL/min; Column temperature: 26 °C; UV detector: 254 nm; MS detector: 1.65K; Run time: 20 min; Retention time: 15.8 min.


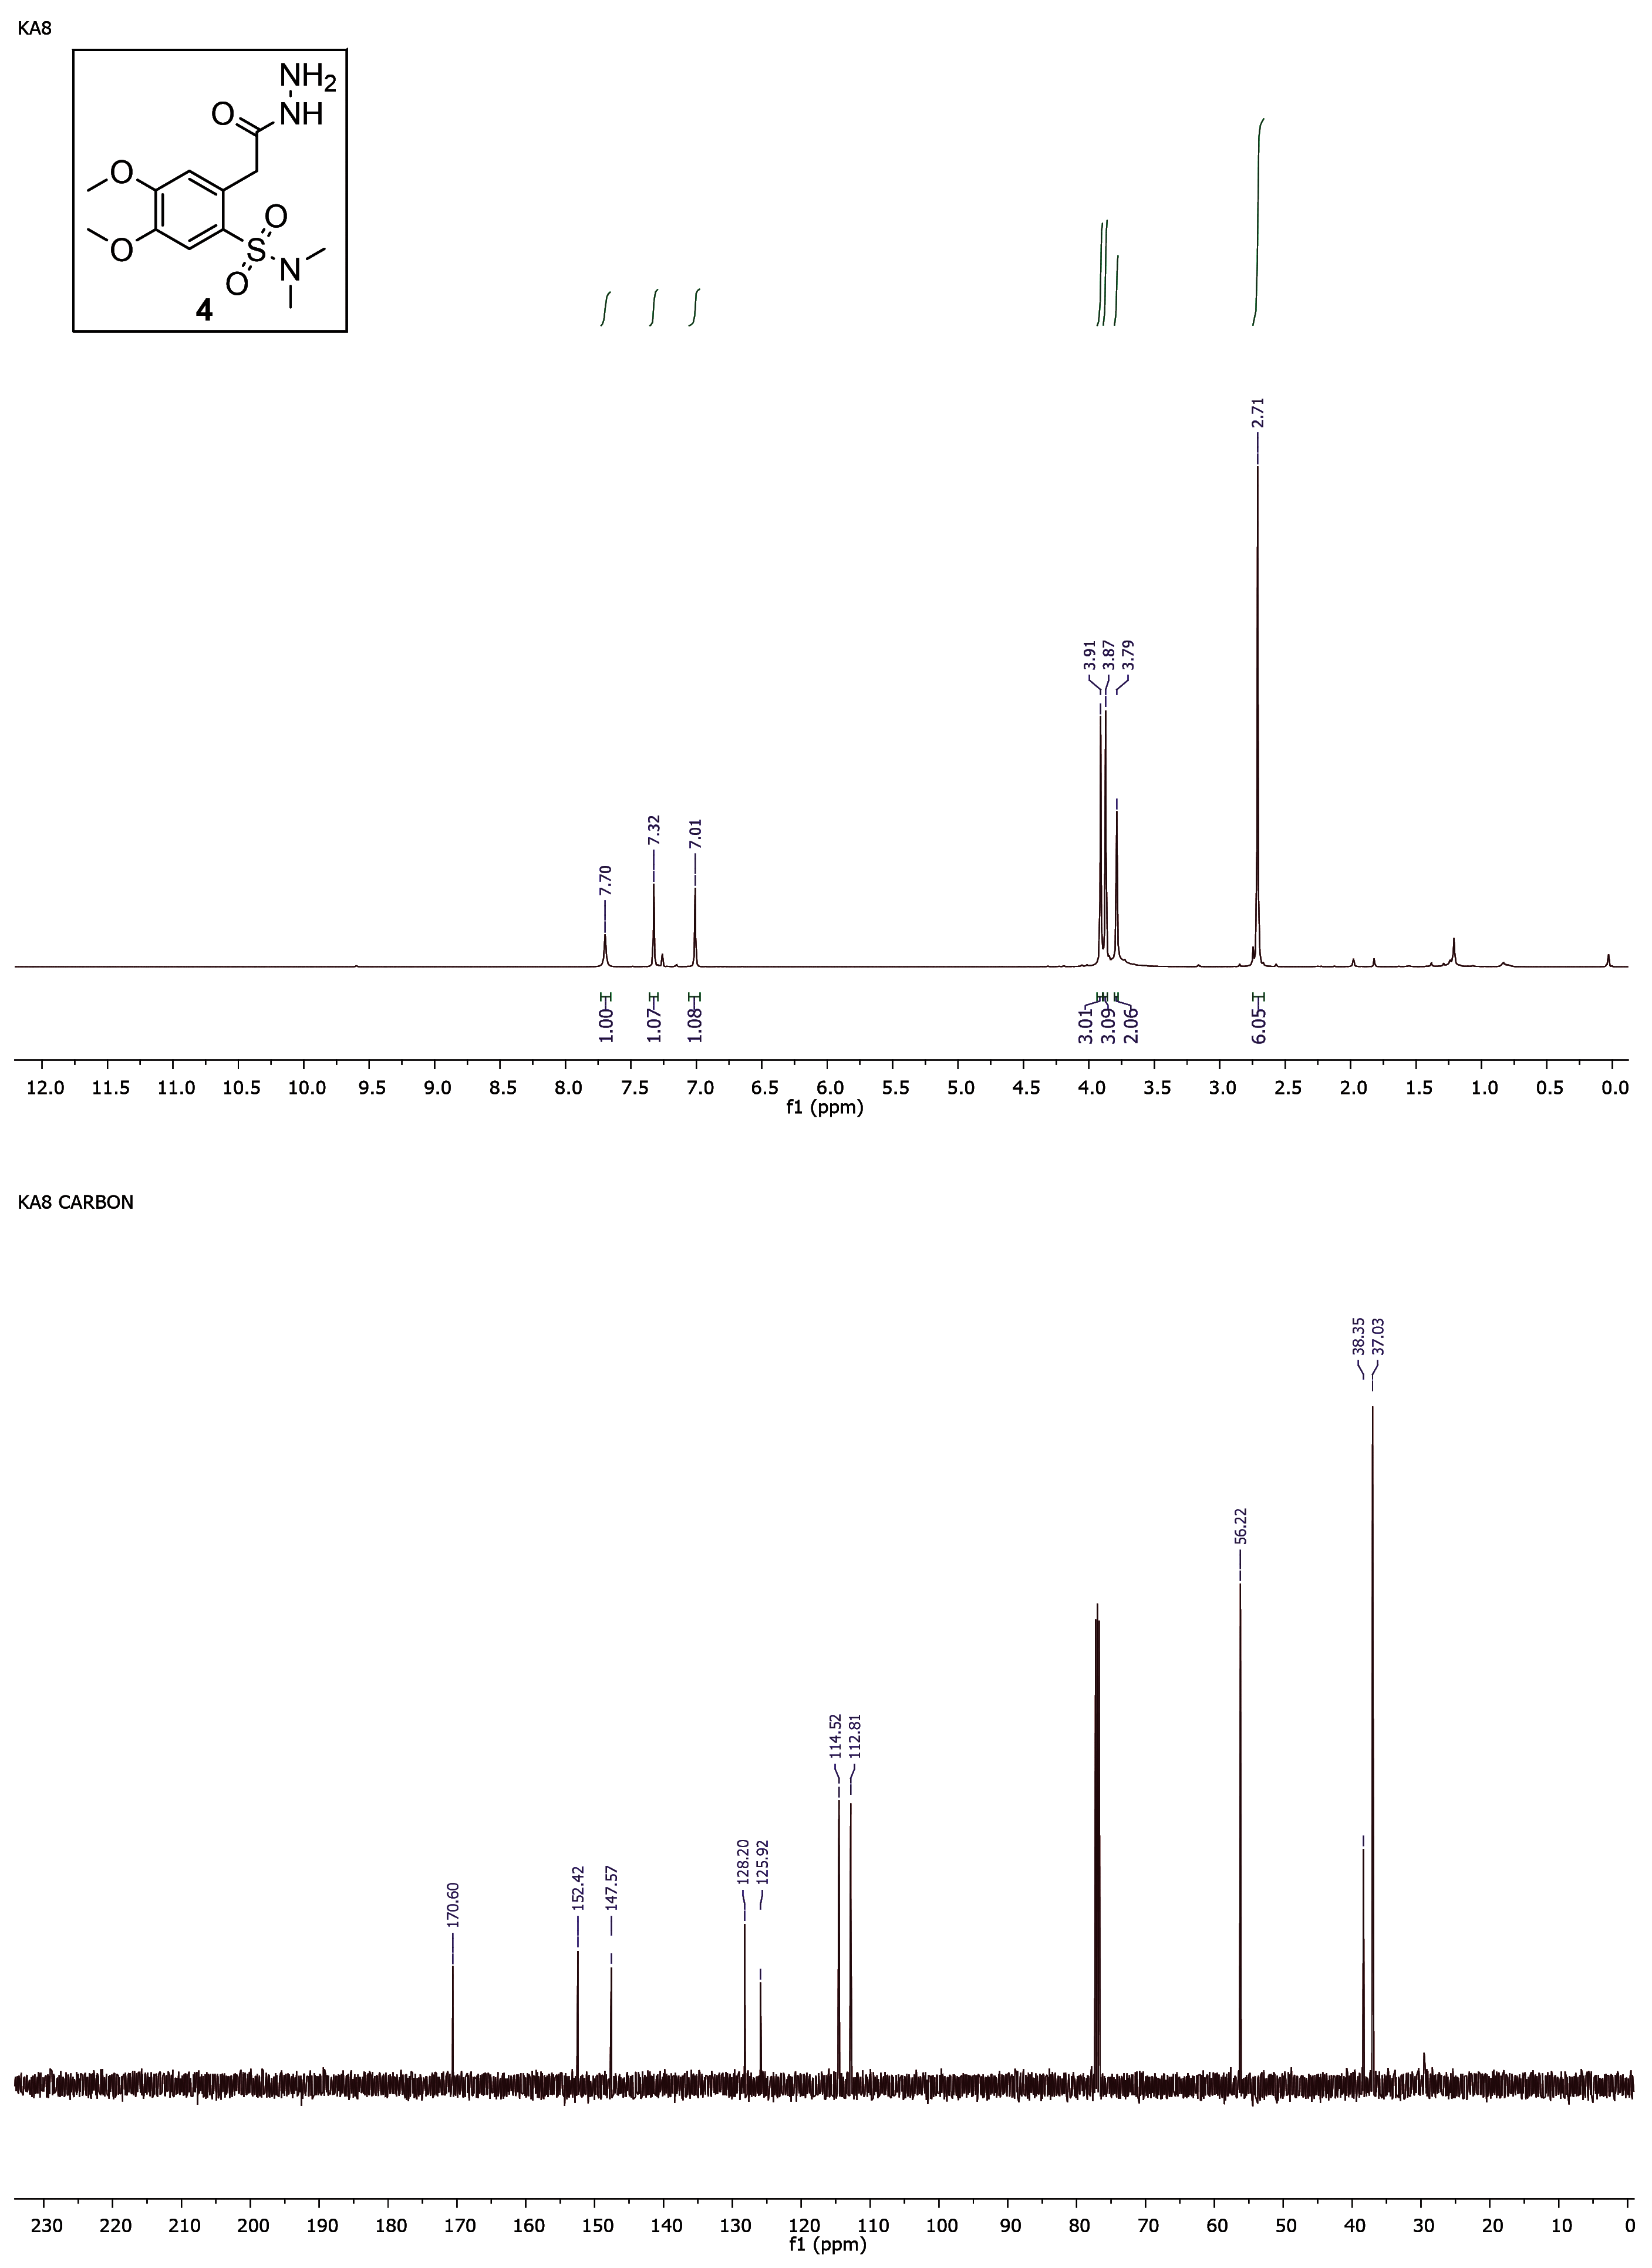


**Figure S6.** 1H-NMR and 13C-NMR spectra forcompound **4.**


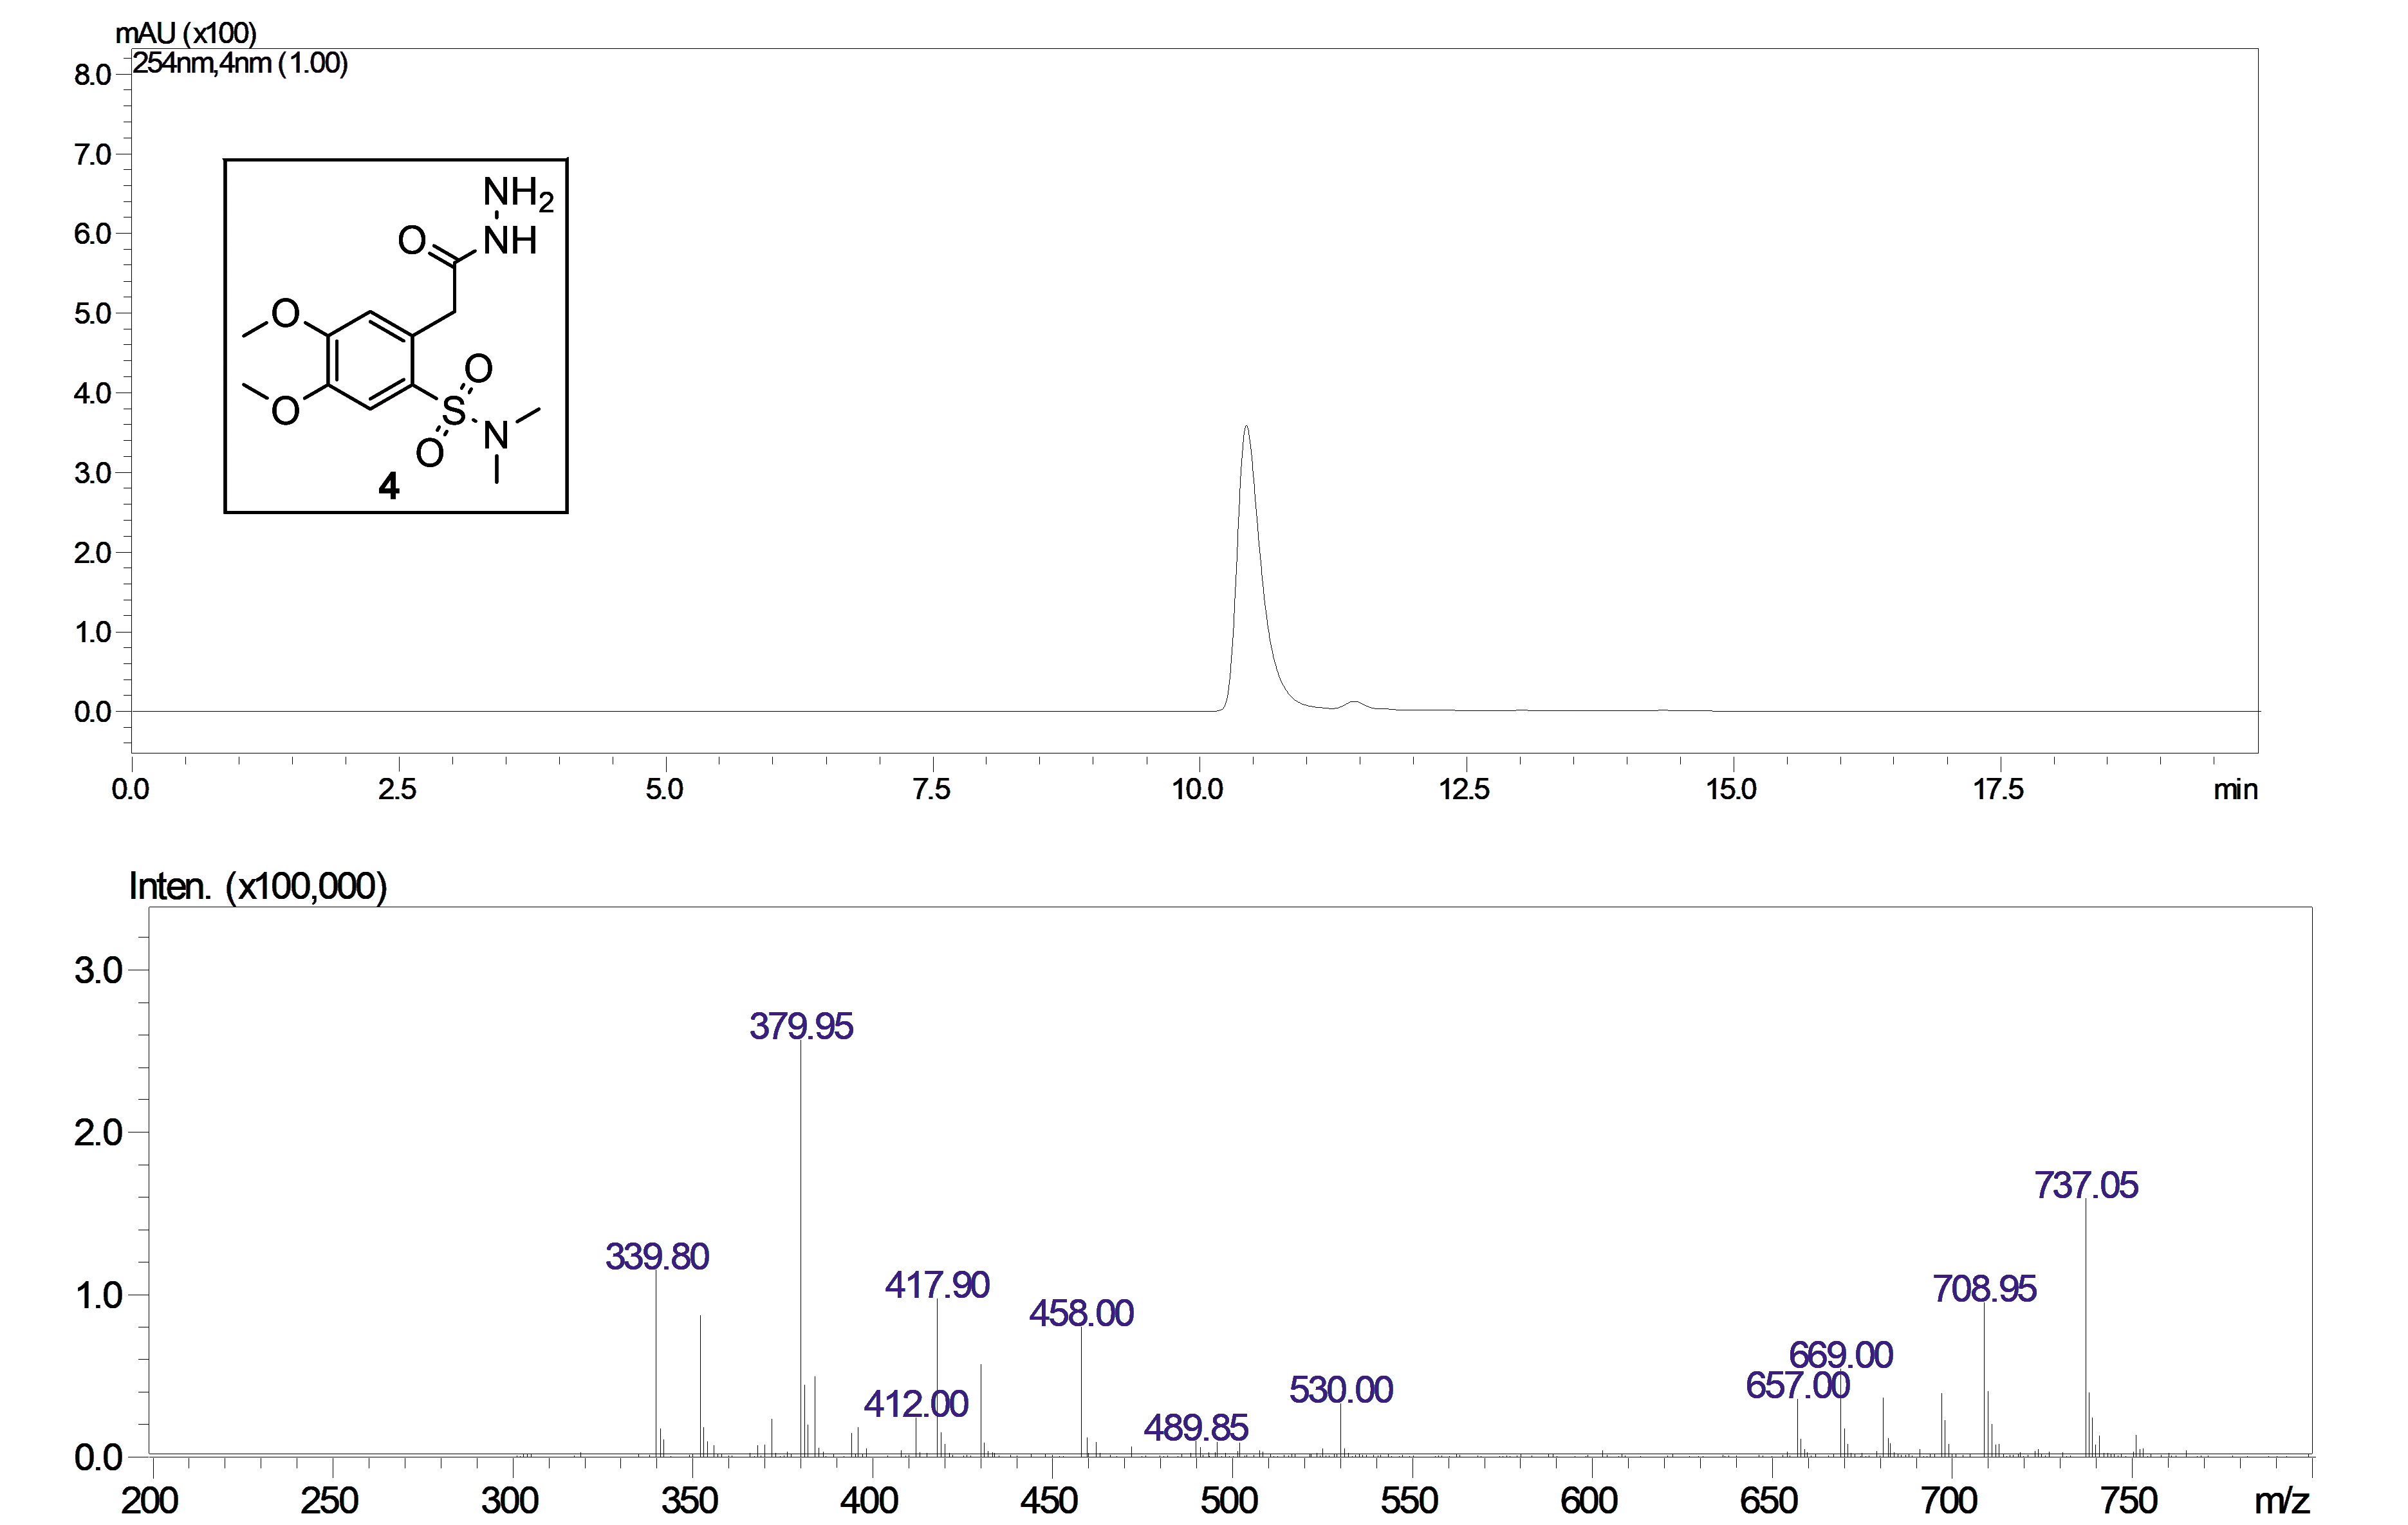


**Figure S7.** LC/ESI-MS analysis forcompound **4.** ESI-MS, positive mode: m/z calcd mass for C12H19N3NaO5S [M+Na]+= 340.09, was found 339.85. Analytical method for LC-MS: LC-20AD Shimadzu connected to Shimadzu LCMS-2010EV; Mobile Phase: methanol; LC isocratic; HPLC column: SUPELCO Discovery C18, 25cm x 4.6mm, 5μm; Flow rate: 0.4 mL/min; Column temperature: 26 °C; UV detector: 254 nm; MS detector: 1.65K; Run time: 20 min; Retention time: 10.4 min.


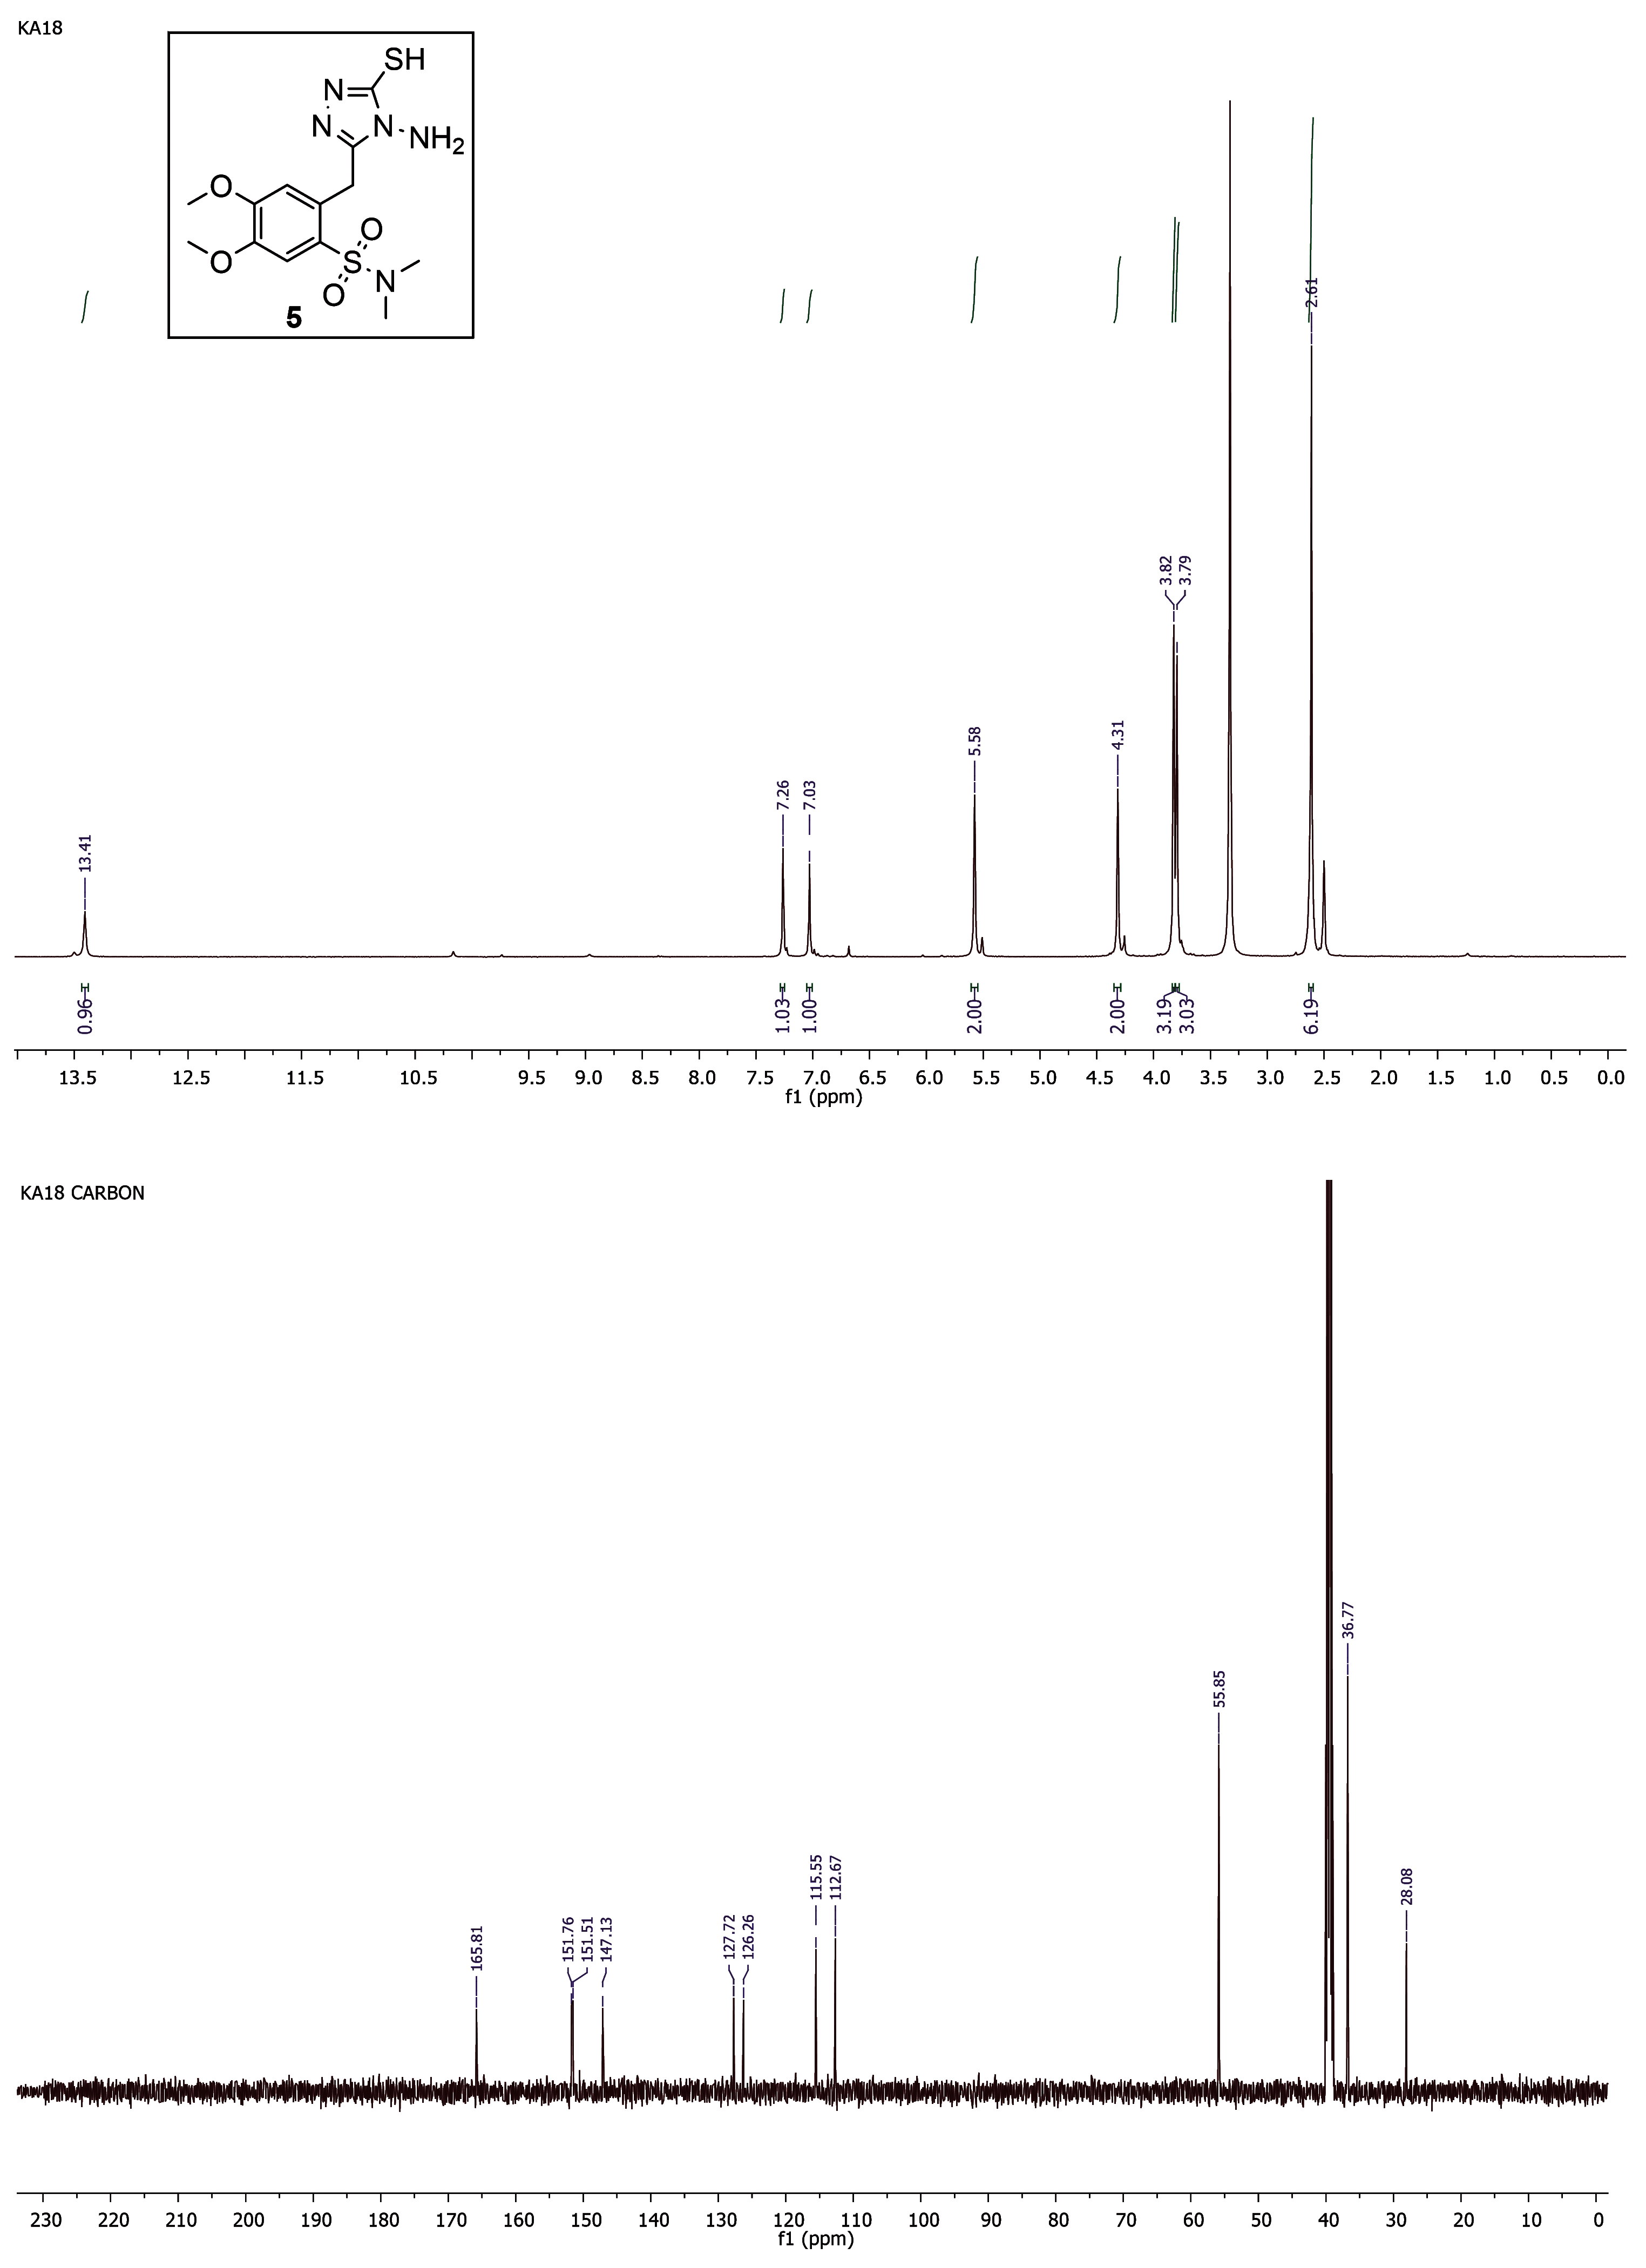


**Figure S8.** 1H-NMR and 13C-NMR spectra forcompound **5.**


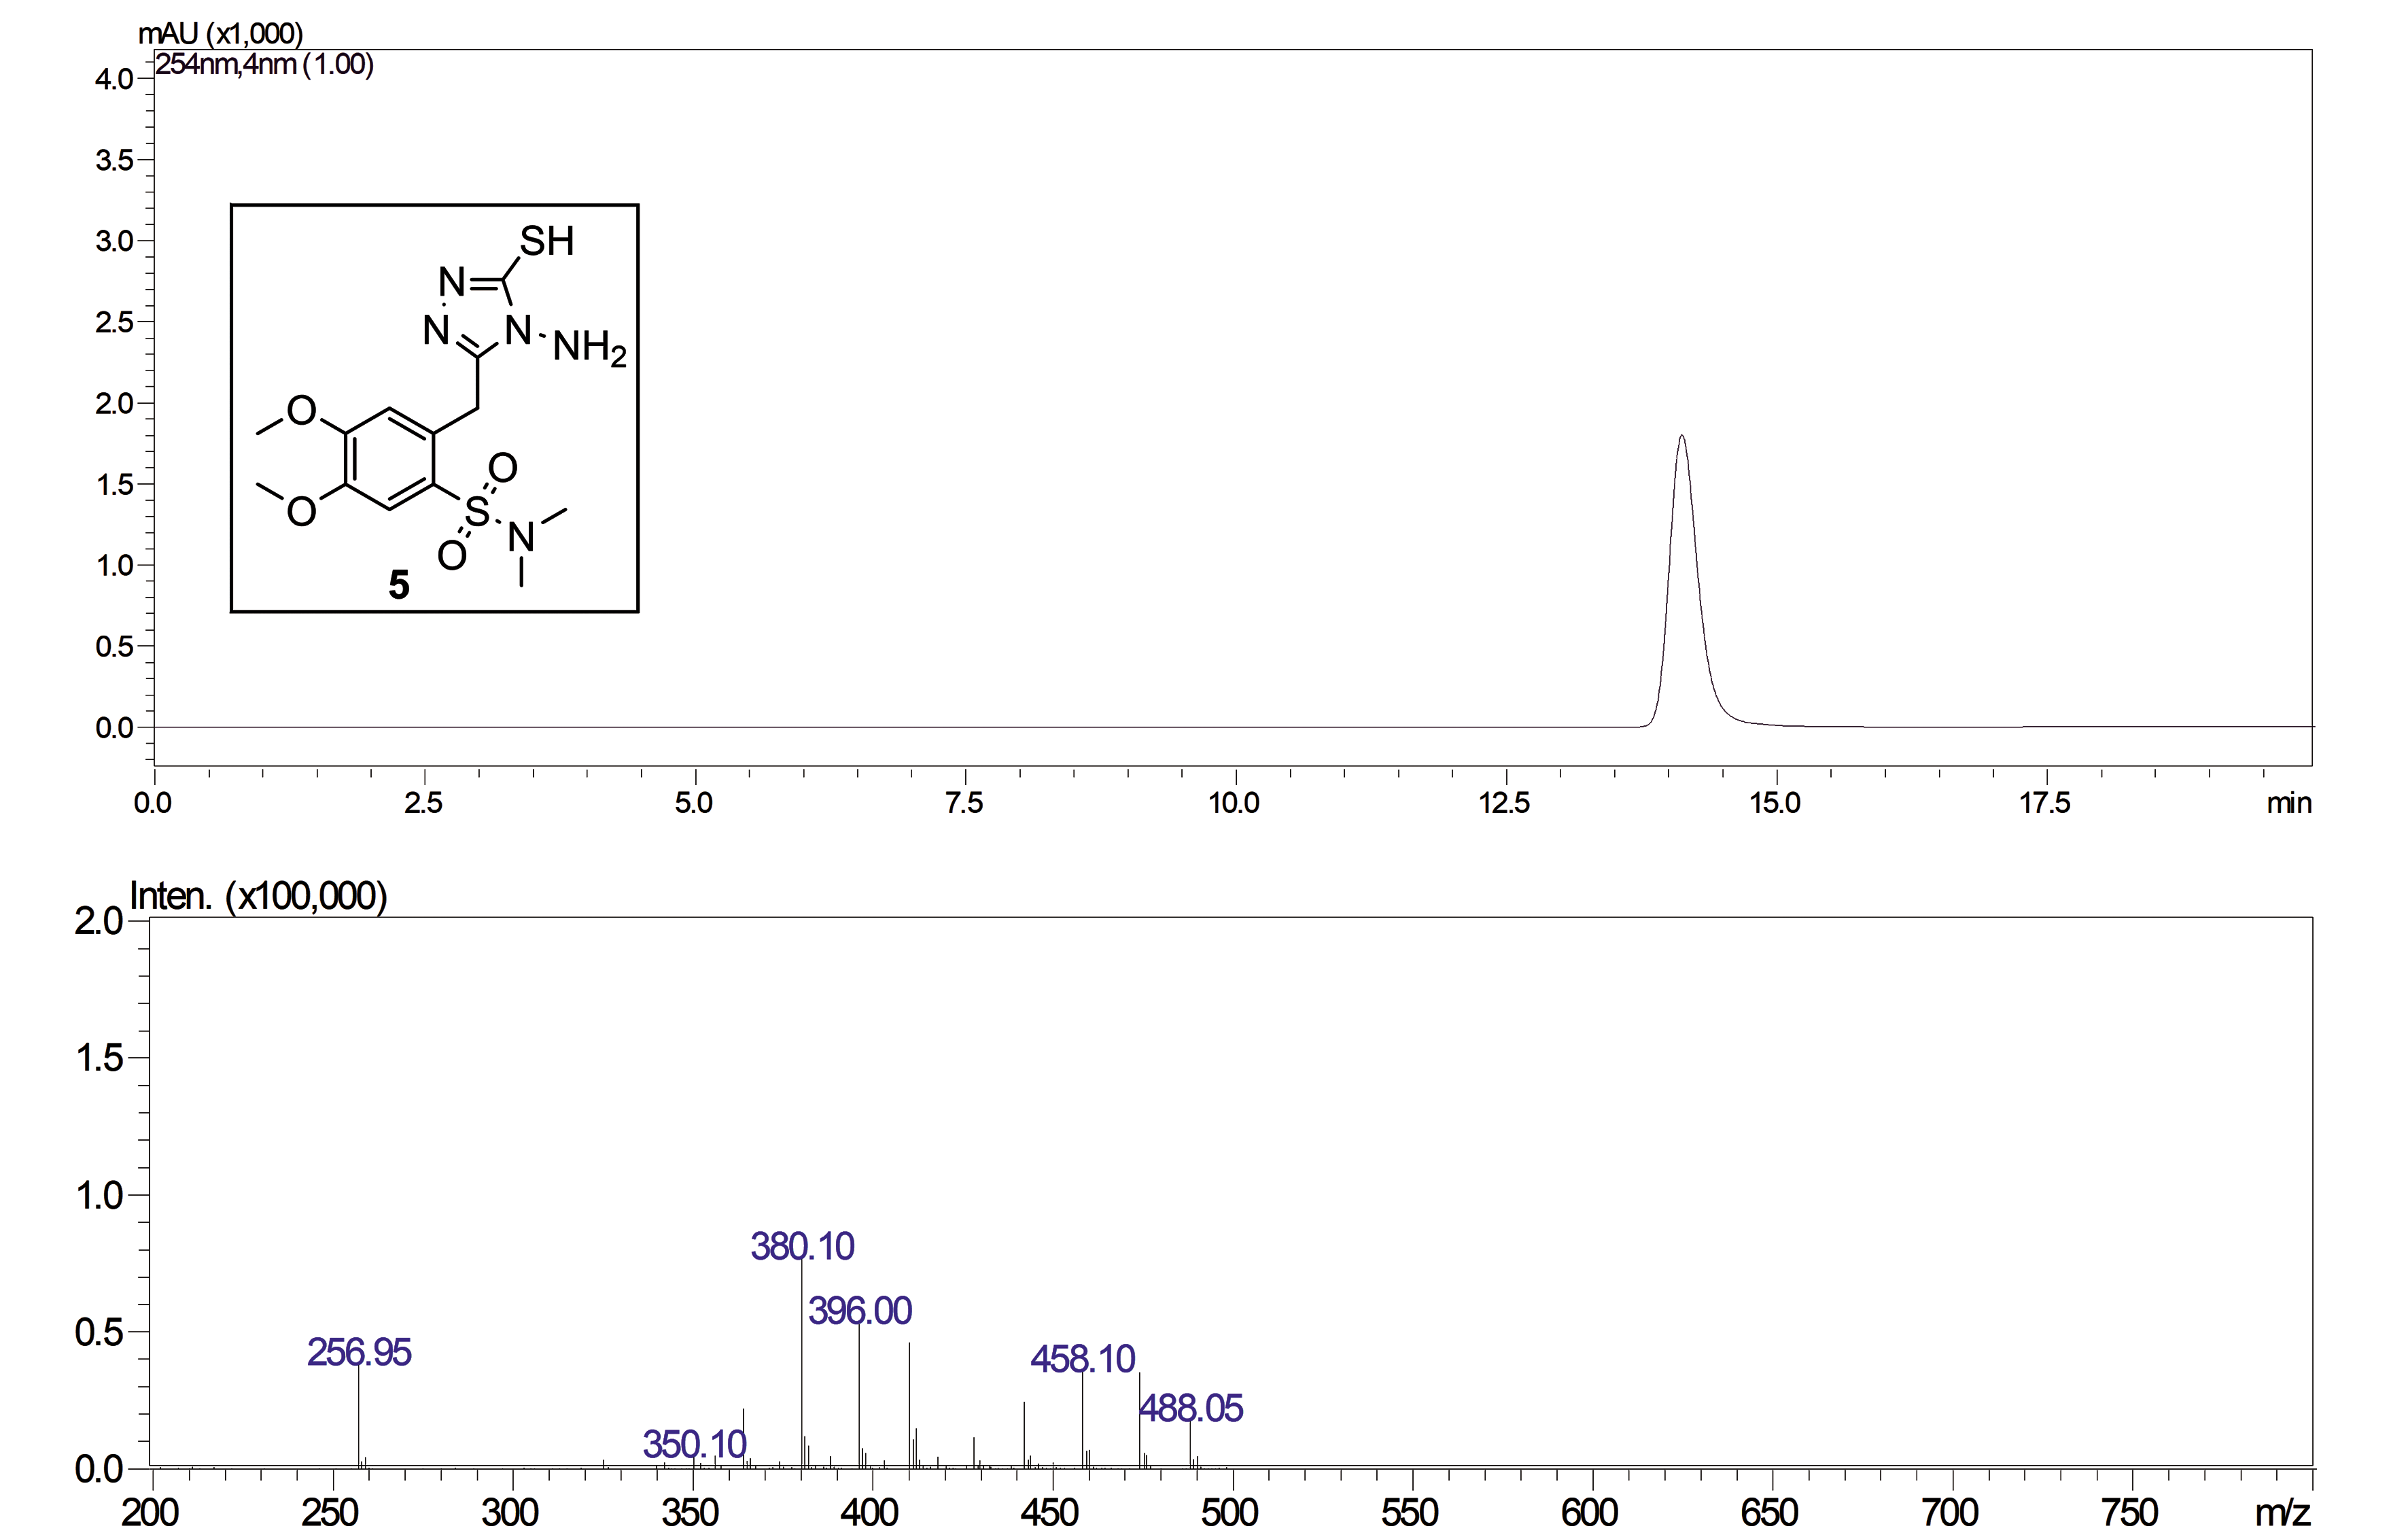


**Figure S9.**LC/ESI-MS analysis forcompound **5.** ESI-MS, positive mode: m/z calcd mass for C13H19N5NaO4S2 [M+Na]+= 396.08, was found 396.00. Analytical method for LC-MS: LC-20AD Shimadzu connected to Shimadzu LCMS-2010EV; Mobile Phase: methanol; LC isocratic; HPLC column: SUPELCO Discovery C18, 25cm x 4.6mm, 5μm; Flow rate: 0.4 mL/min; Column temperature: 26 °C; UV detector: 254 nm; MS detector: 1.65K; Run time: 20 min; Retention time: 14.1 min.


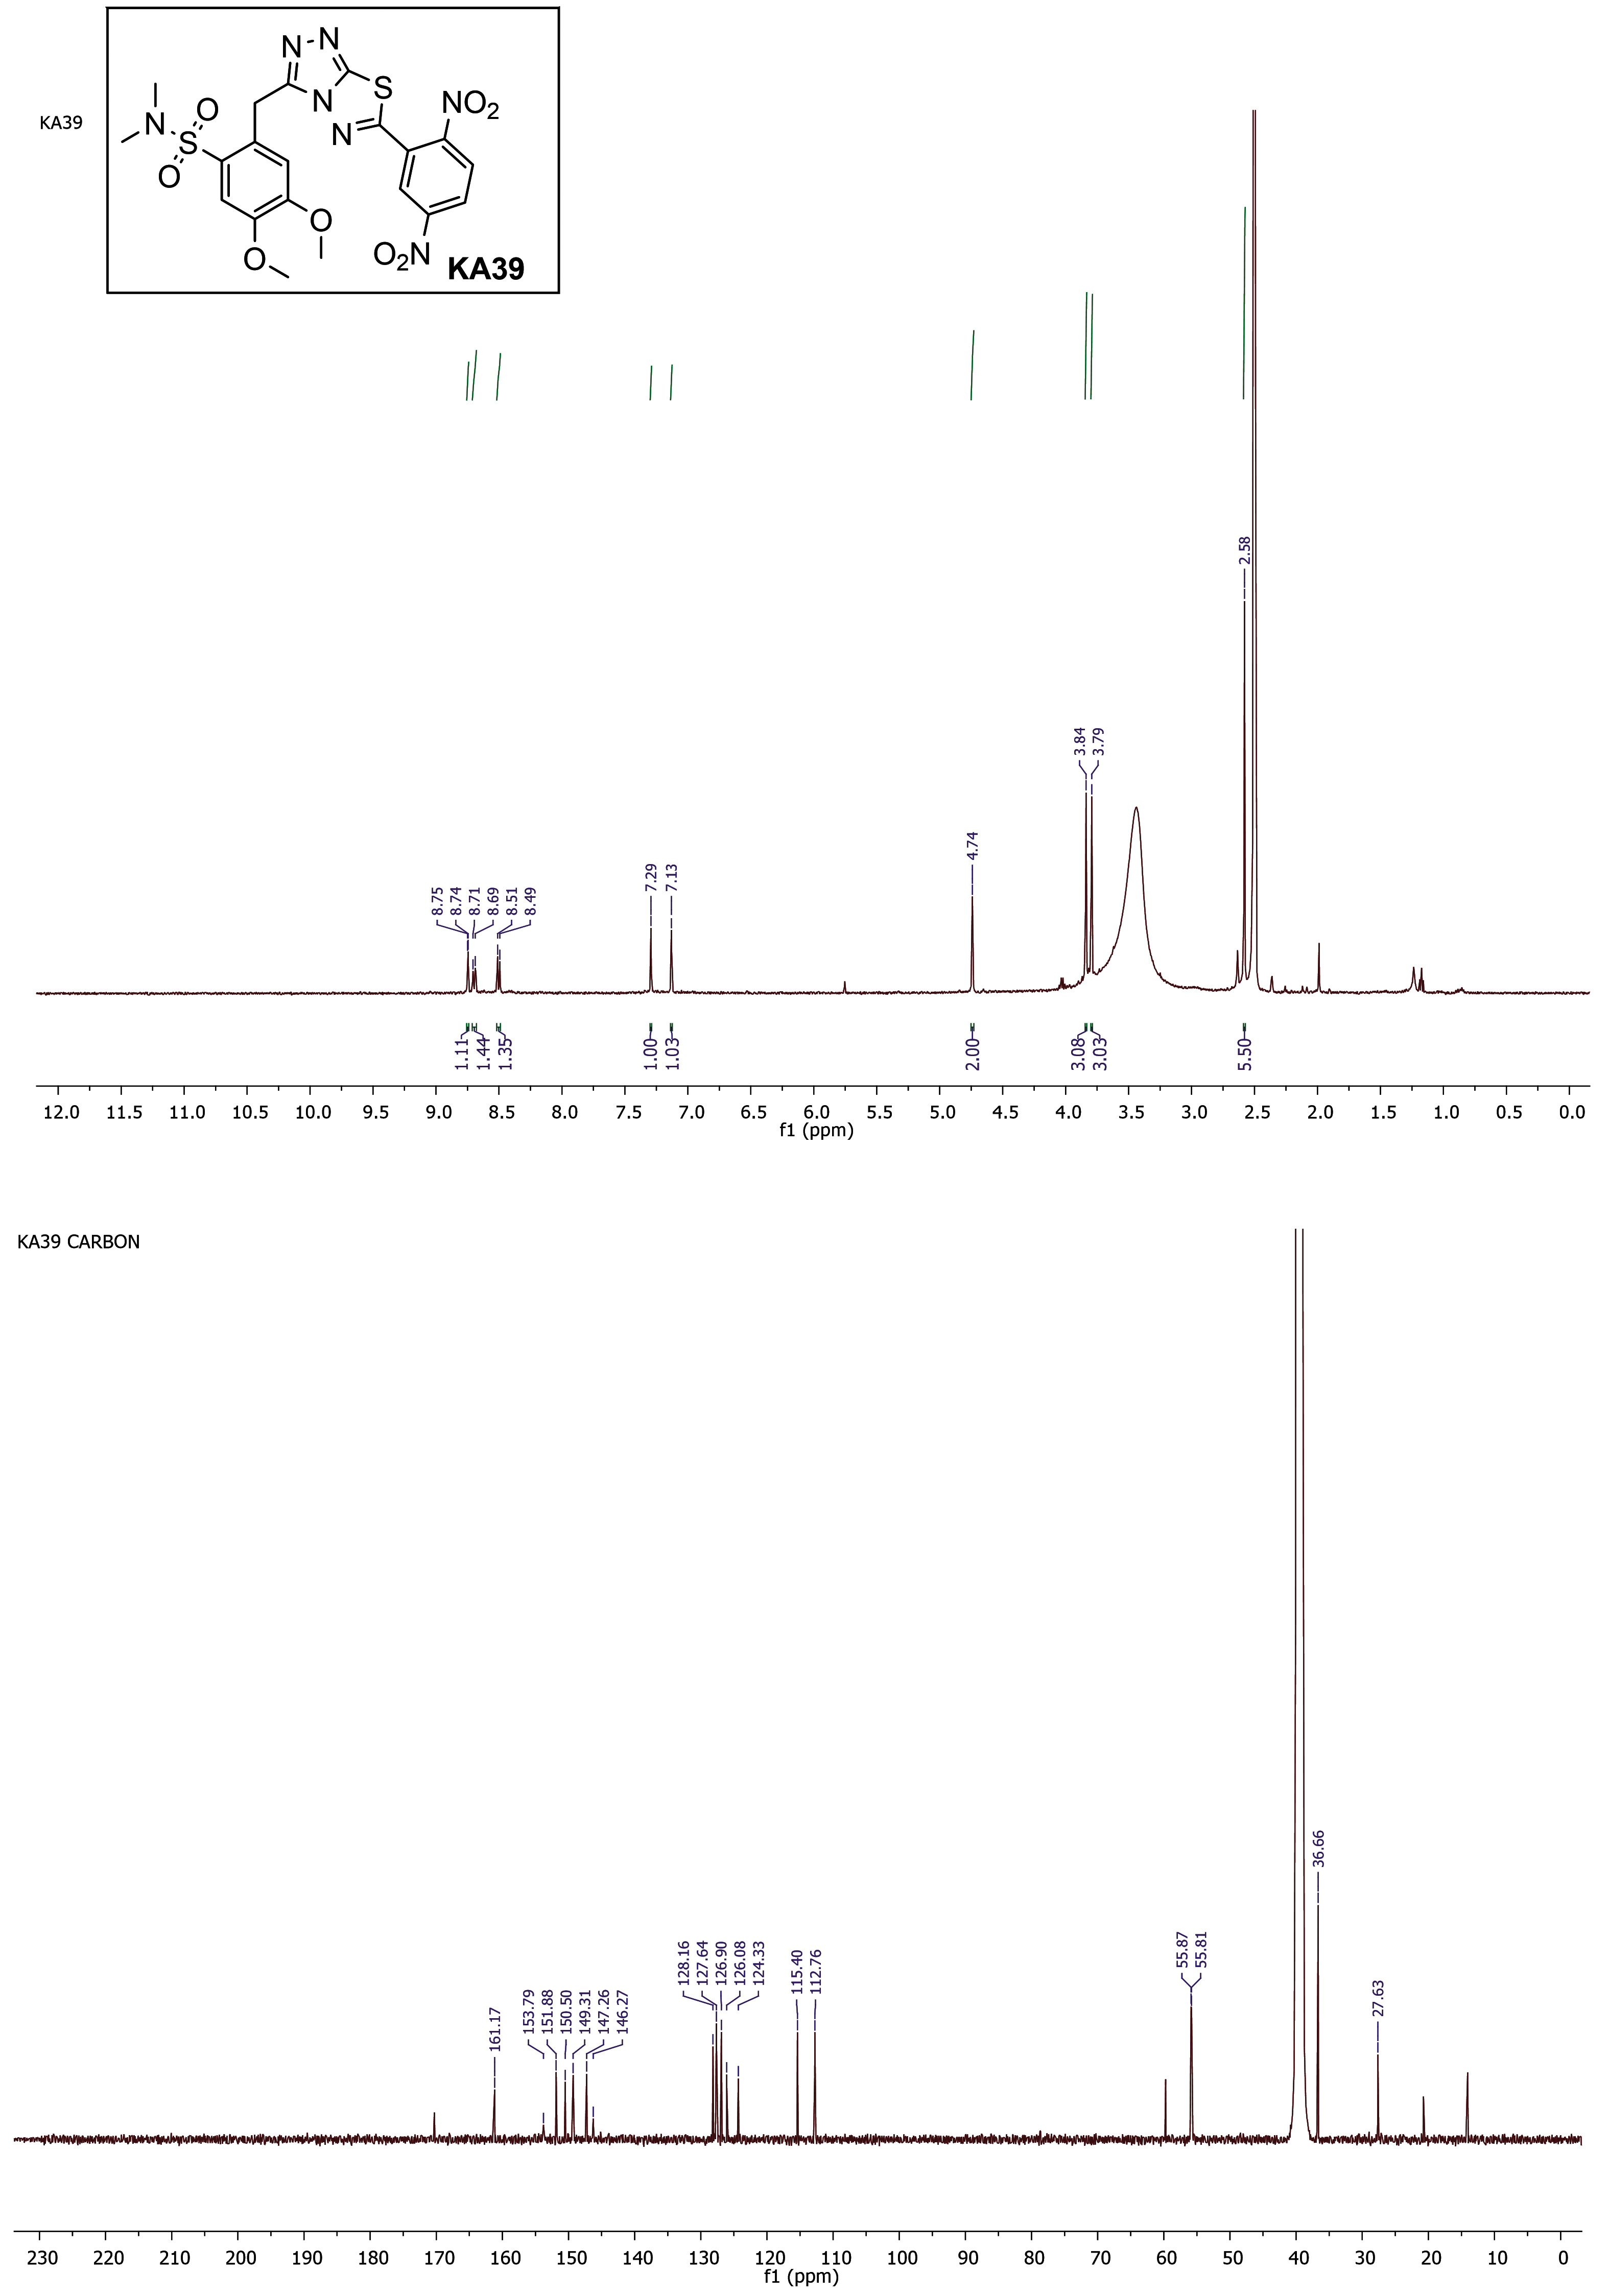


**Figure S10.** 1H-NMR and 13C-NMR spectra forcompound **KA39.**


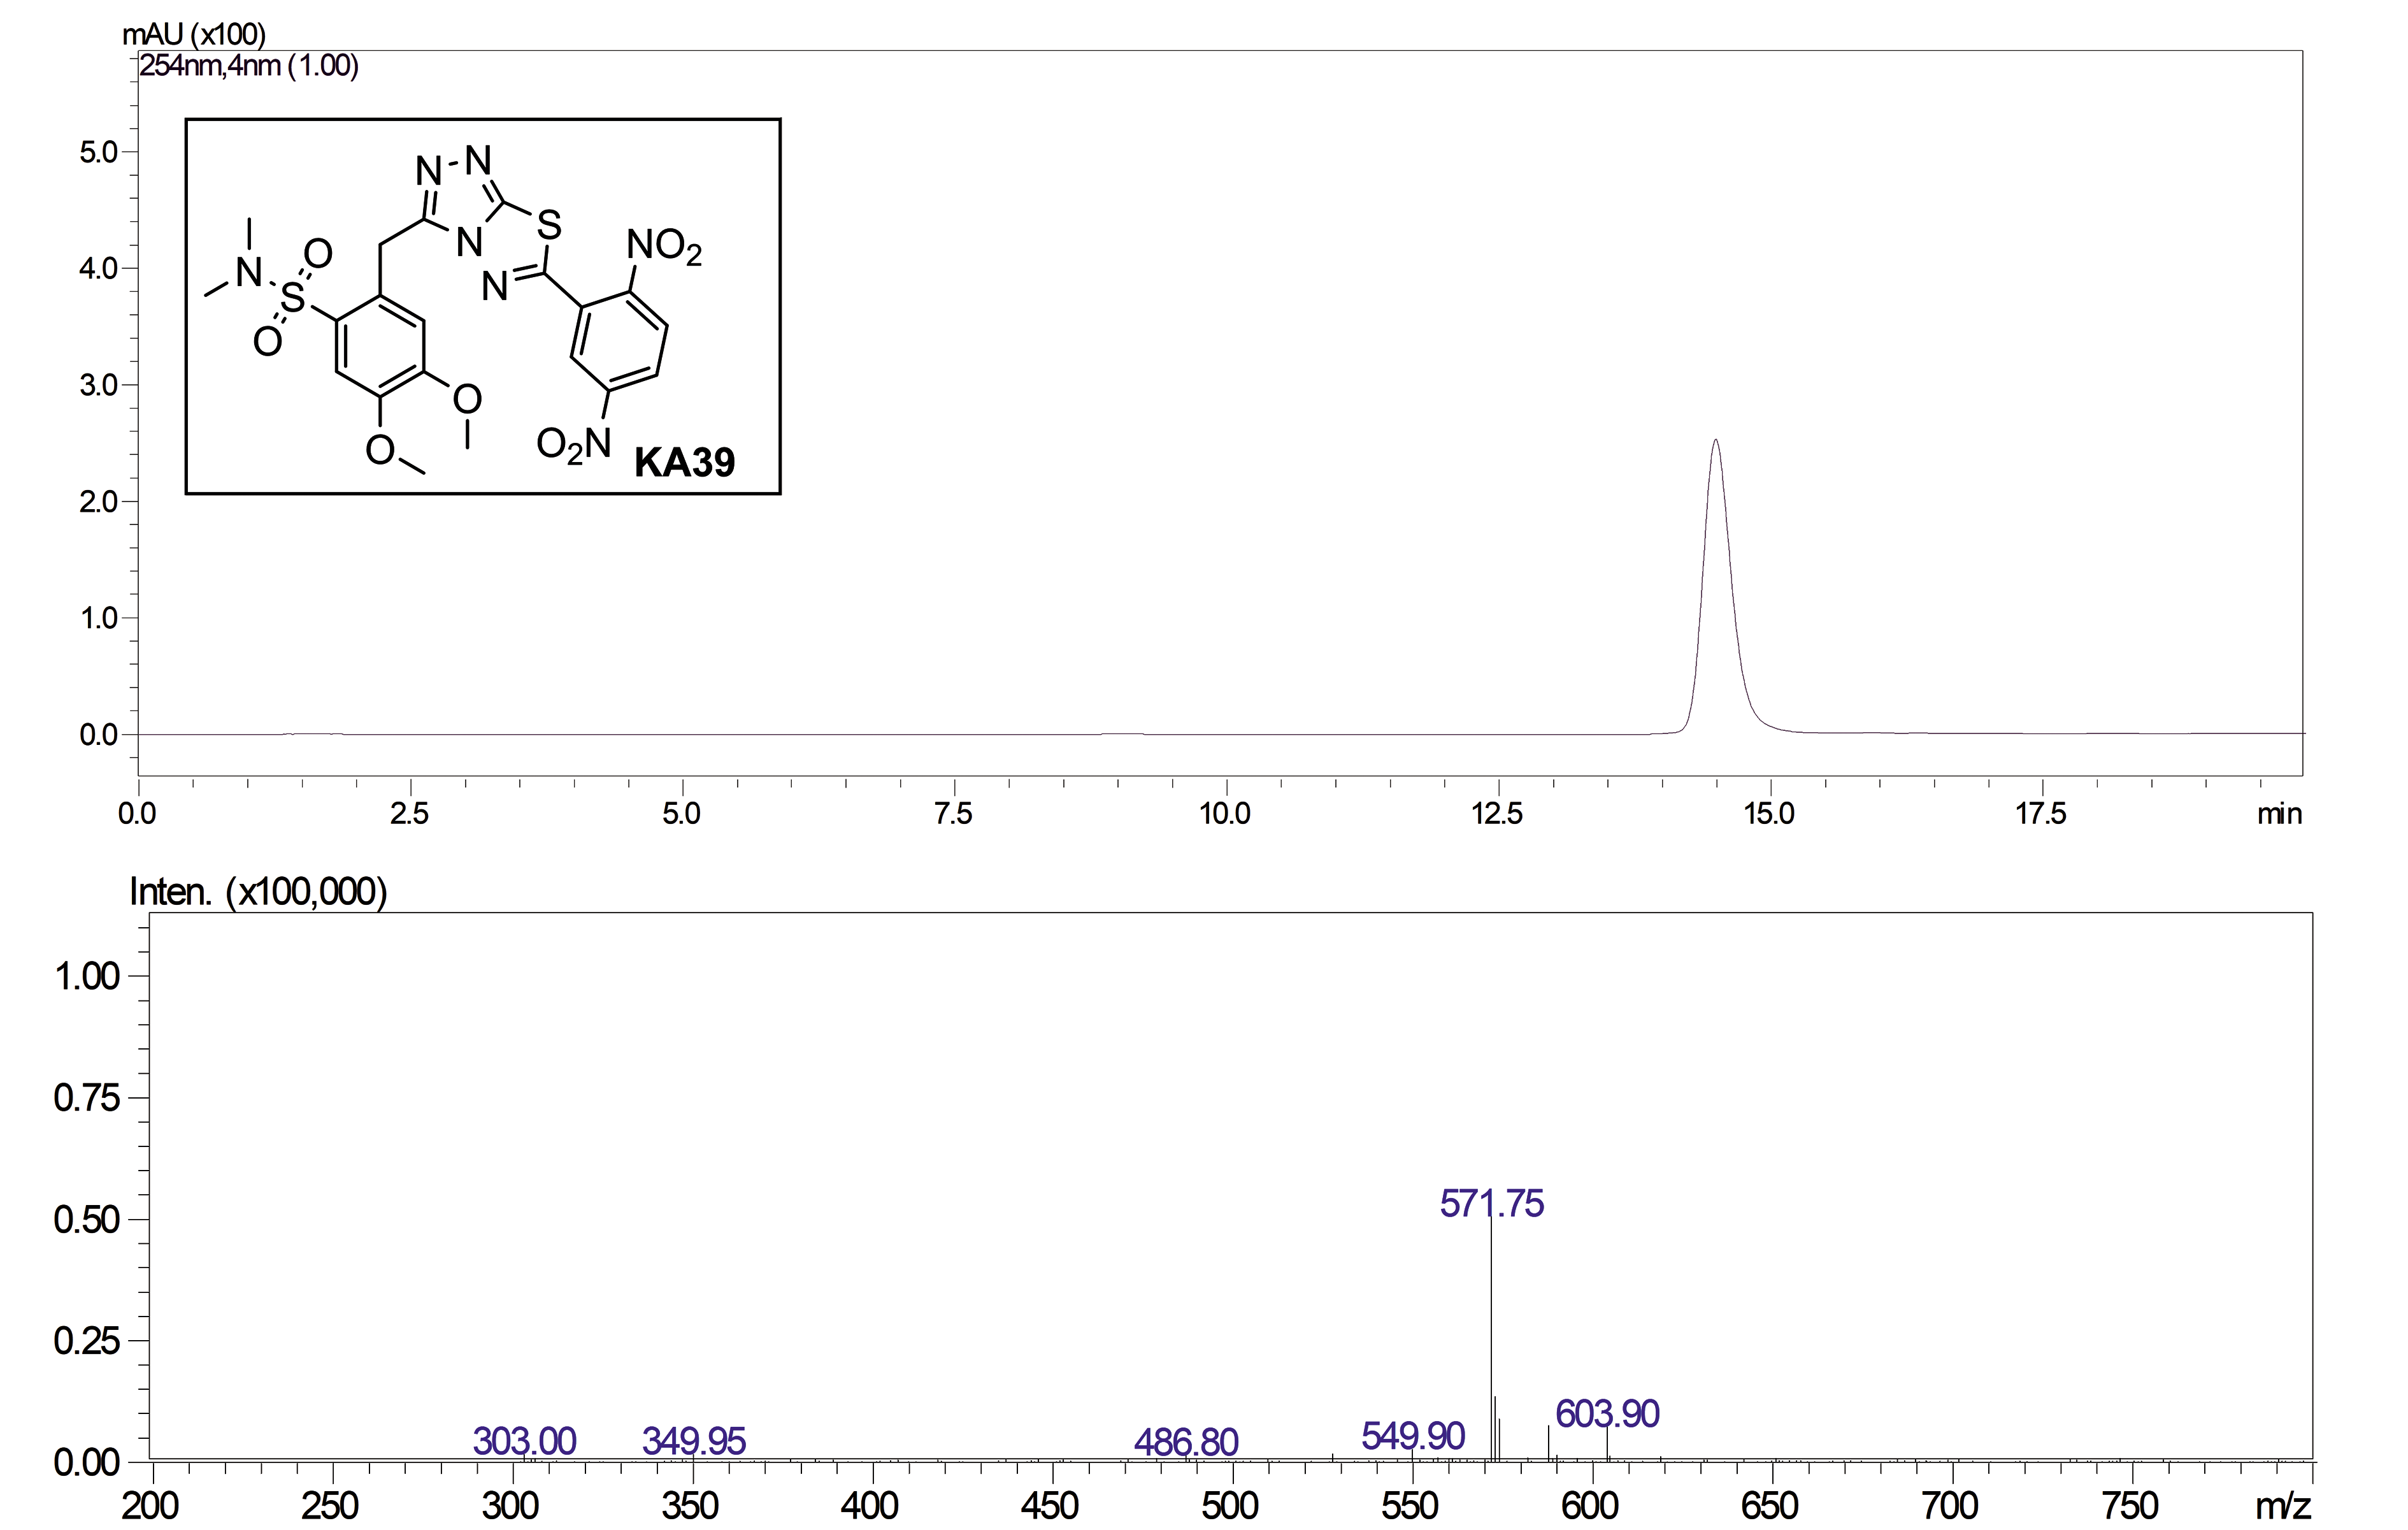


**Figure S11.** LC/ESI-MS analysis forcompound **KA39.** ESI-MS, positive mode: m/z calcd mass for C20H19N7NaO8S2 [M+Na]+= 572.06, was found 571.75. Analytical method for LC-MS: LC-20AD Shimadzu connected to Shimadzu LCMS-2010EV; Mobile Phase: methanol; LC isocratic; HPLC column: SUPELCO Discovery C18, 25cm x 4.6mm, 5μm; Flow rate: 0.4 mL/min; Column temperature: 26 °C; UV detector: 254 nm; MS detector: 1.65K; Run time: 20 min; Retention time: 14.5 min.


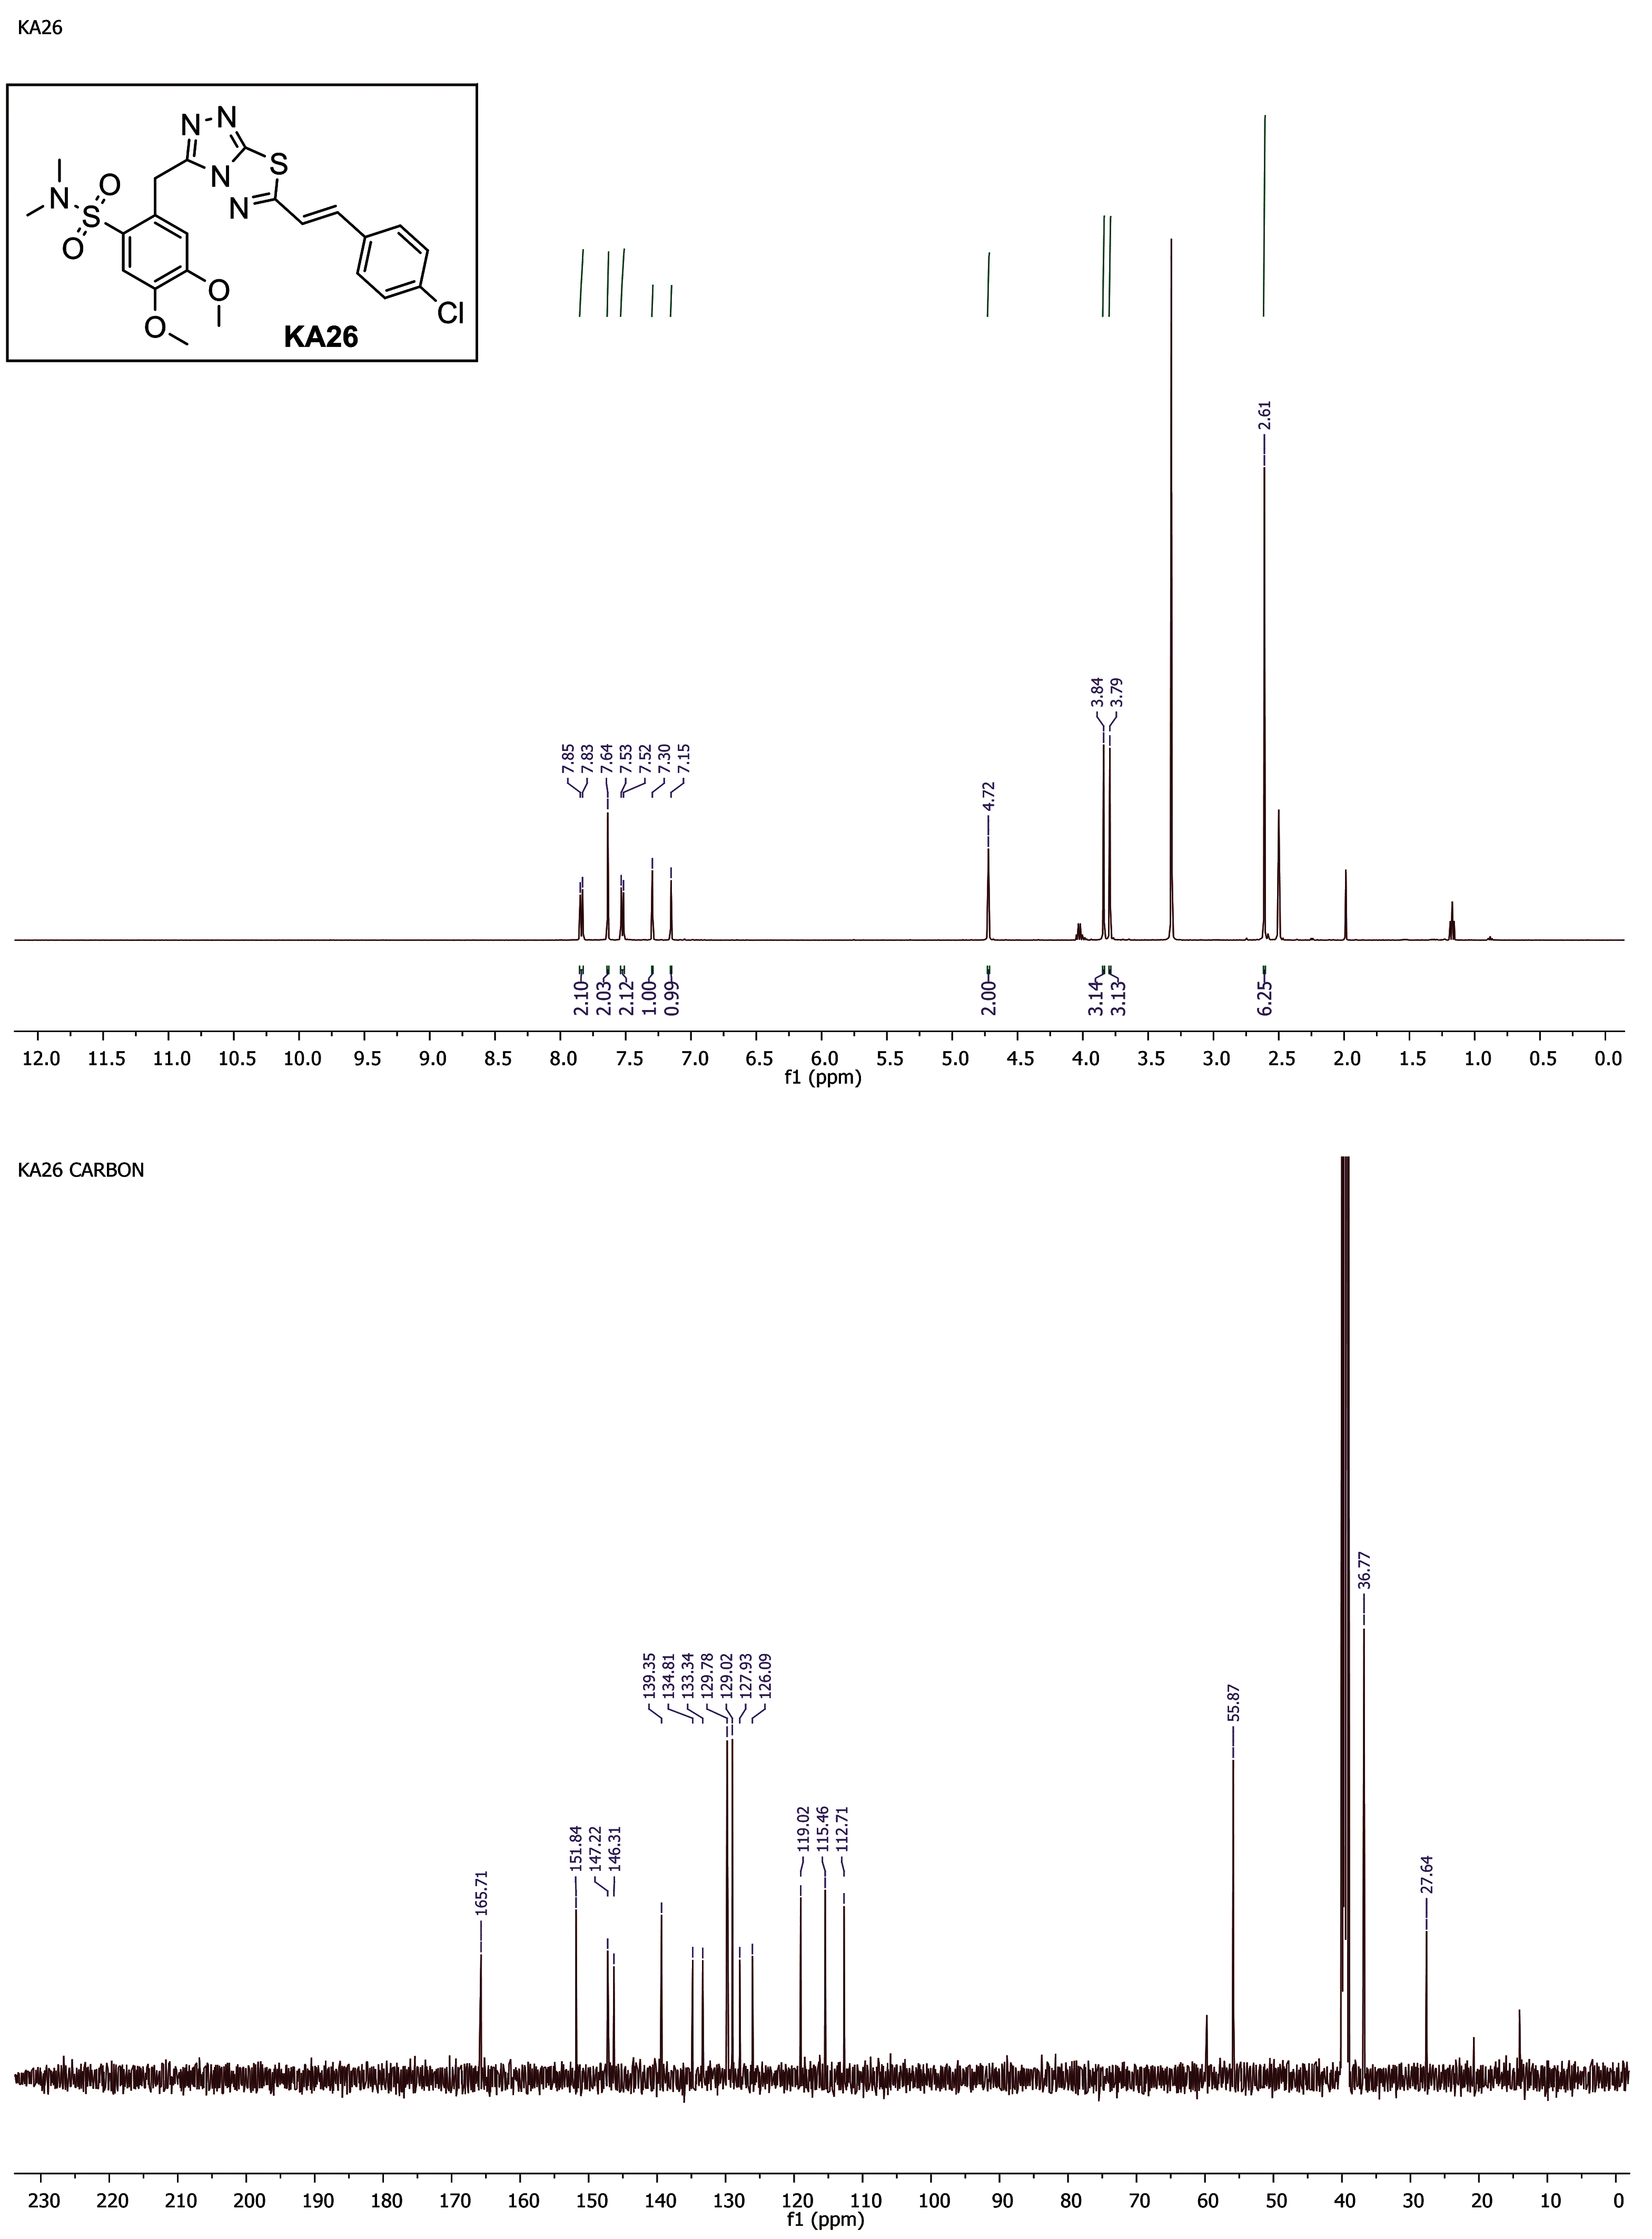


**Figure S12.** 1H-NMR and 13C-NMR spectra forcompound **KA26.**


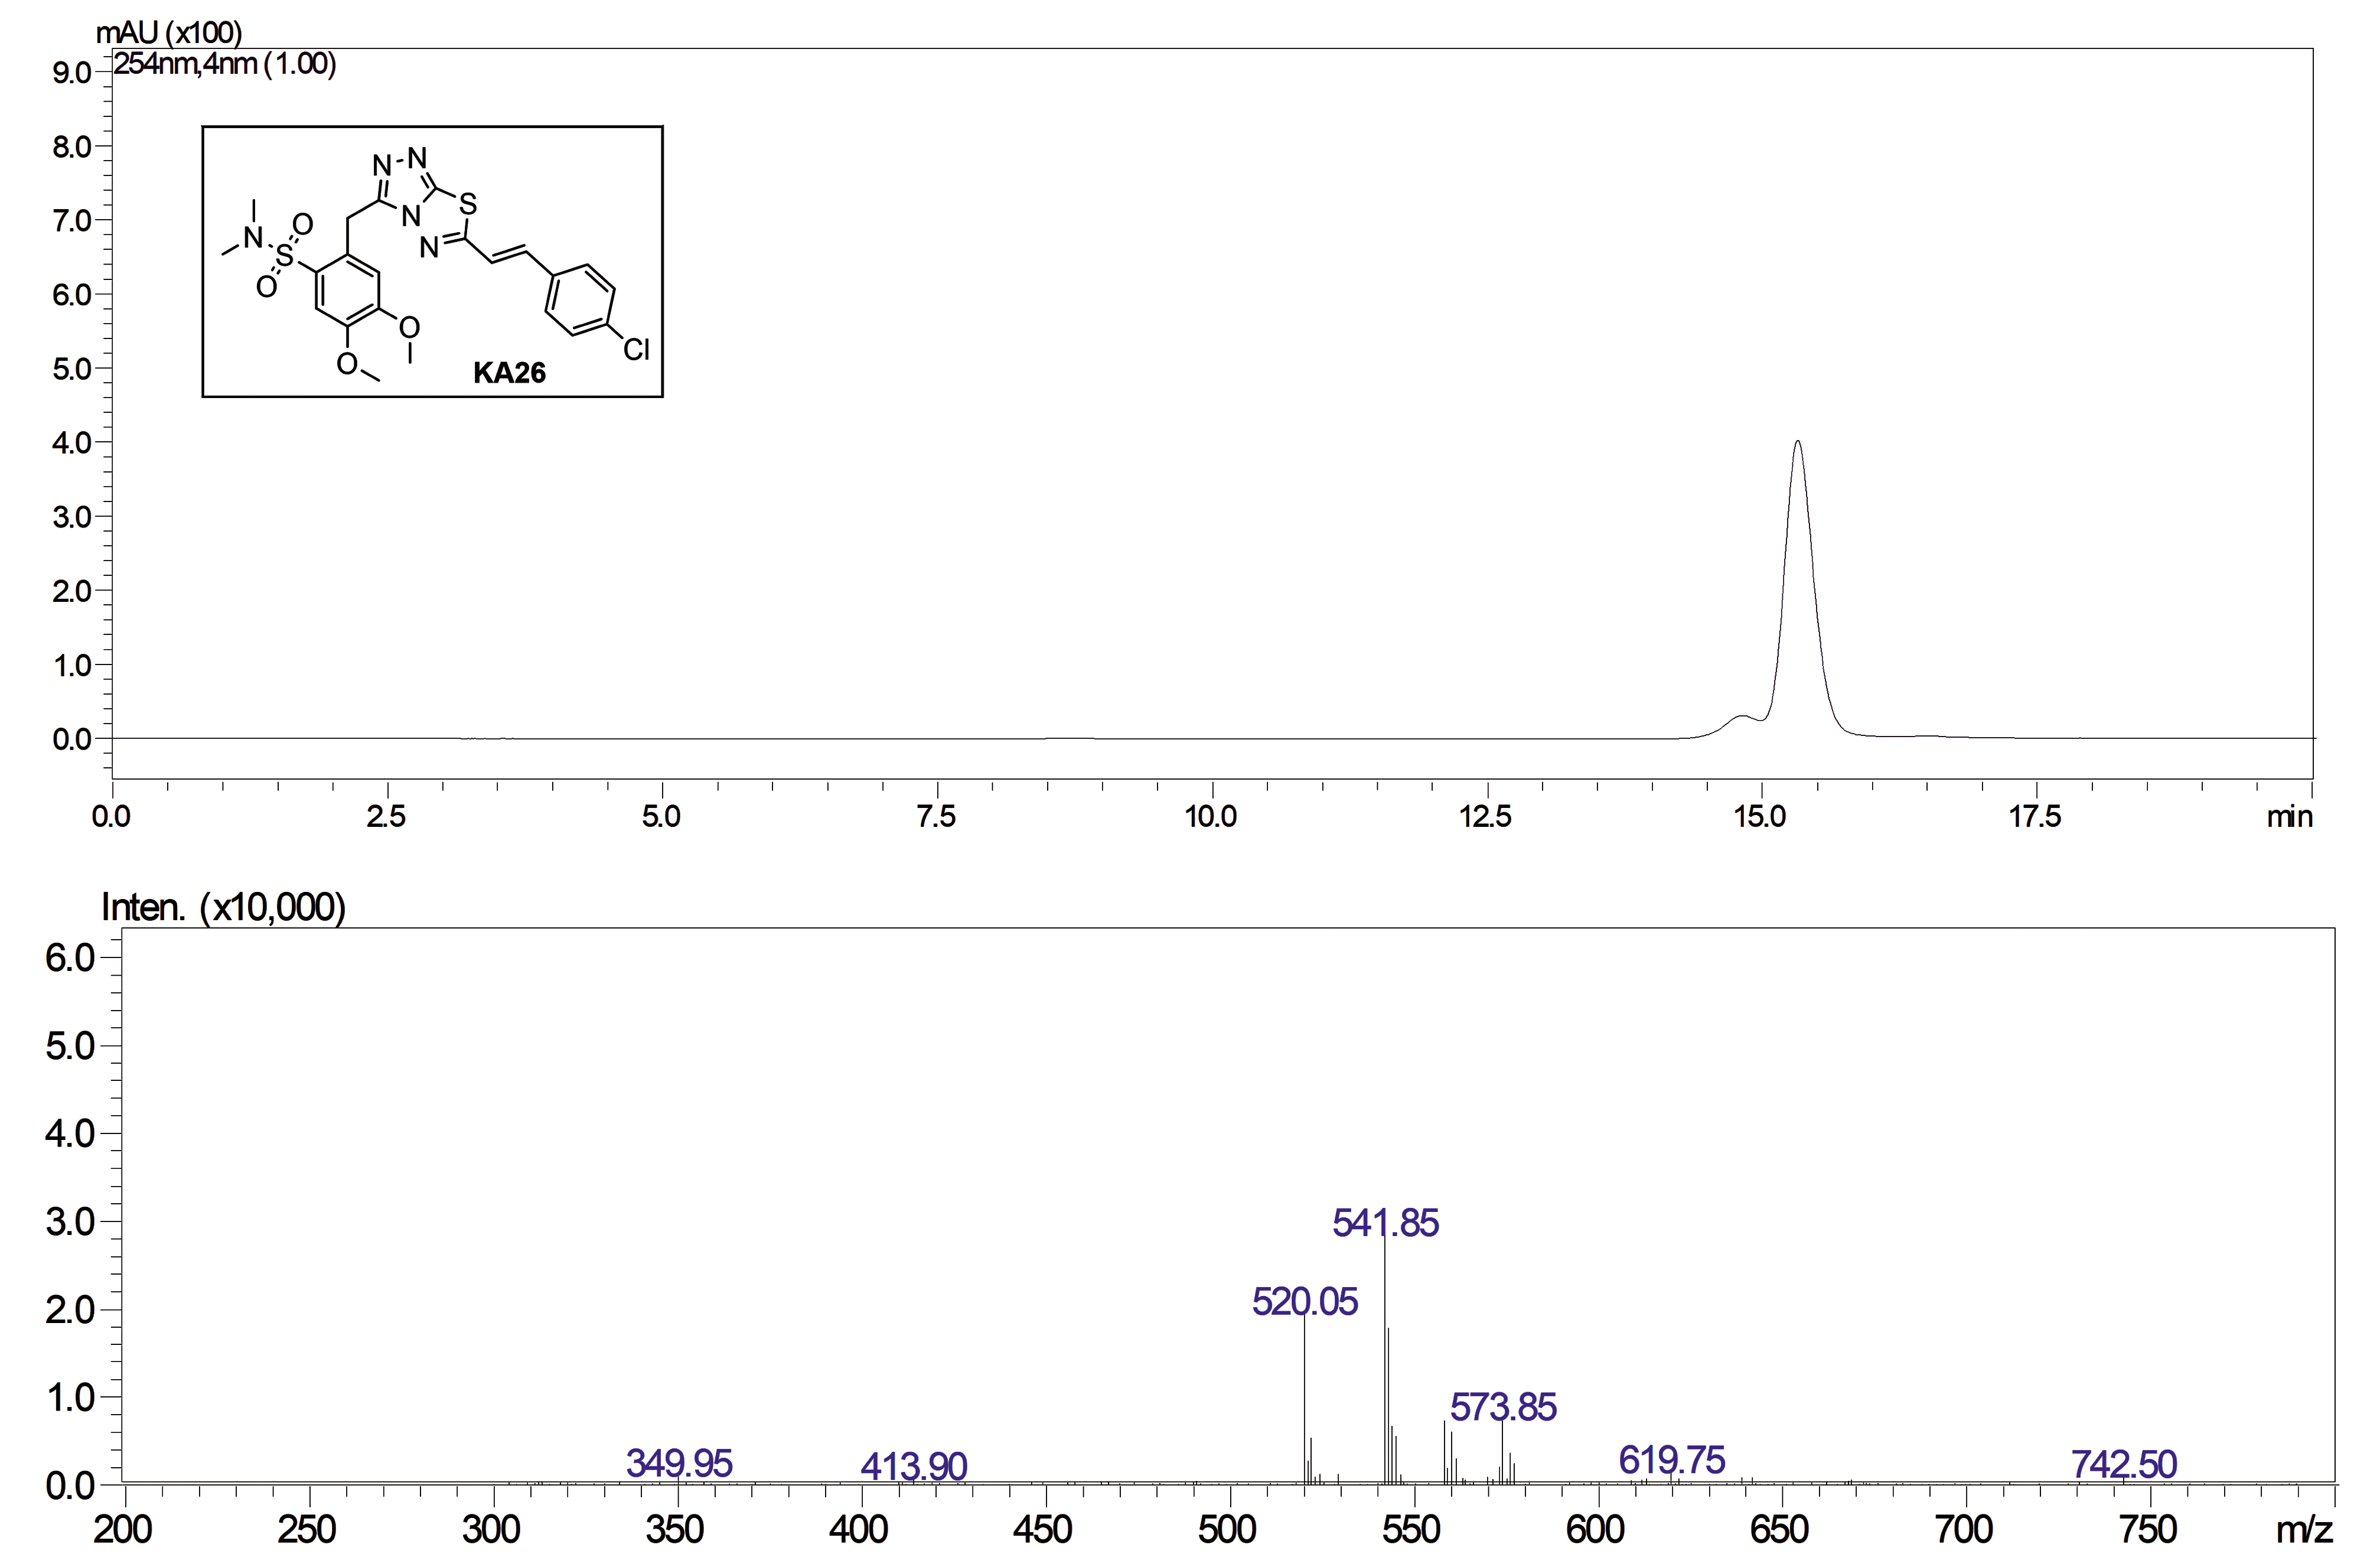


**Figure S13.**LC/ESI-MS analysis forcompound **KA26.** ESI-MS, positive mode: m/z calcd mass for C22H22ClN5NaO4S2 [M+Na]+= 542.07, was found 541.85. Analytical method for LC-MS: LC-20AD Shimadzu connected to Shimadzu LCMS-2010EV; Mobile Phase: methanol; LC isocratic; HPLC column: SUPELCO Discovery C18, 25cm x 4.6mm, 5μm; Flow rate: 0.4 mL/min; Column temperature: 26 °C; UV detector: 254 nm; MS detector: 1.65K; Run time: 20 min; Retention time: 15.4 min.


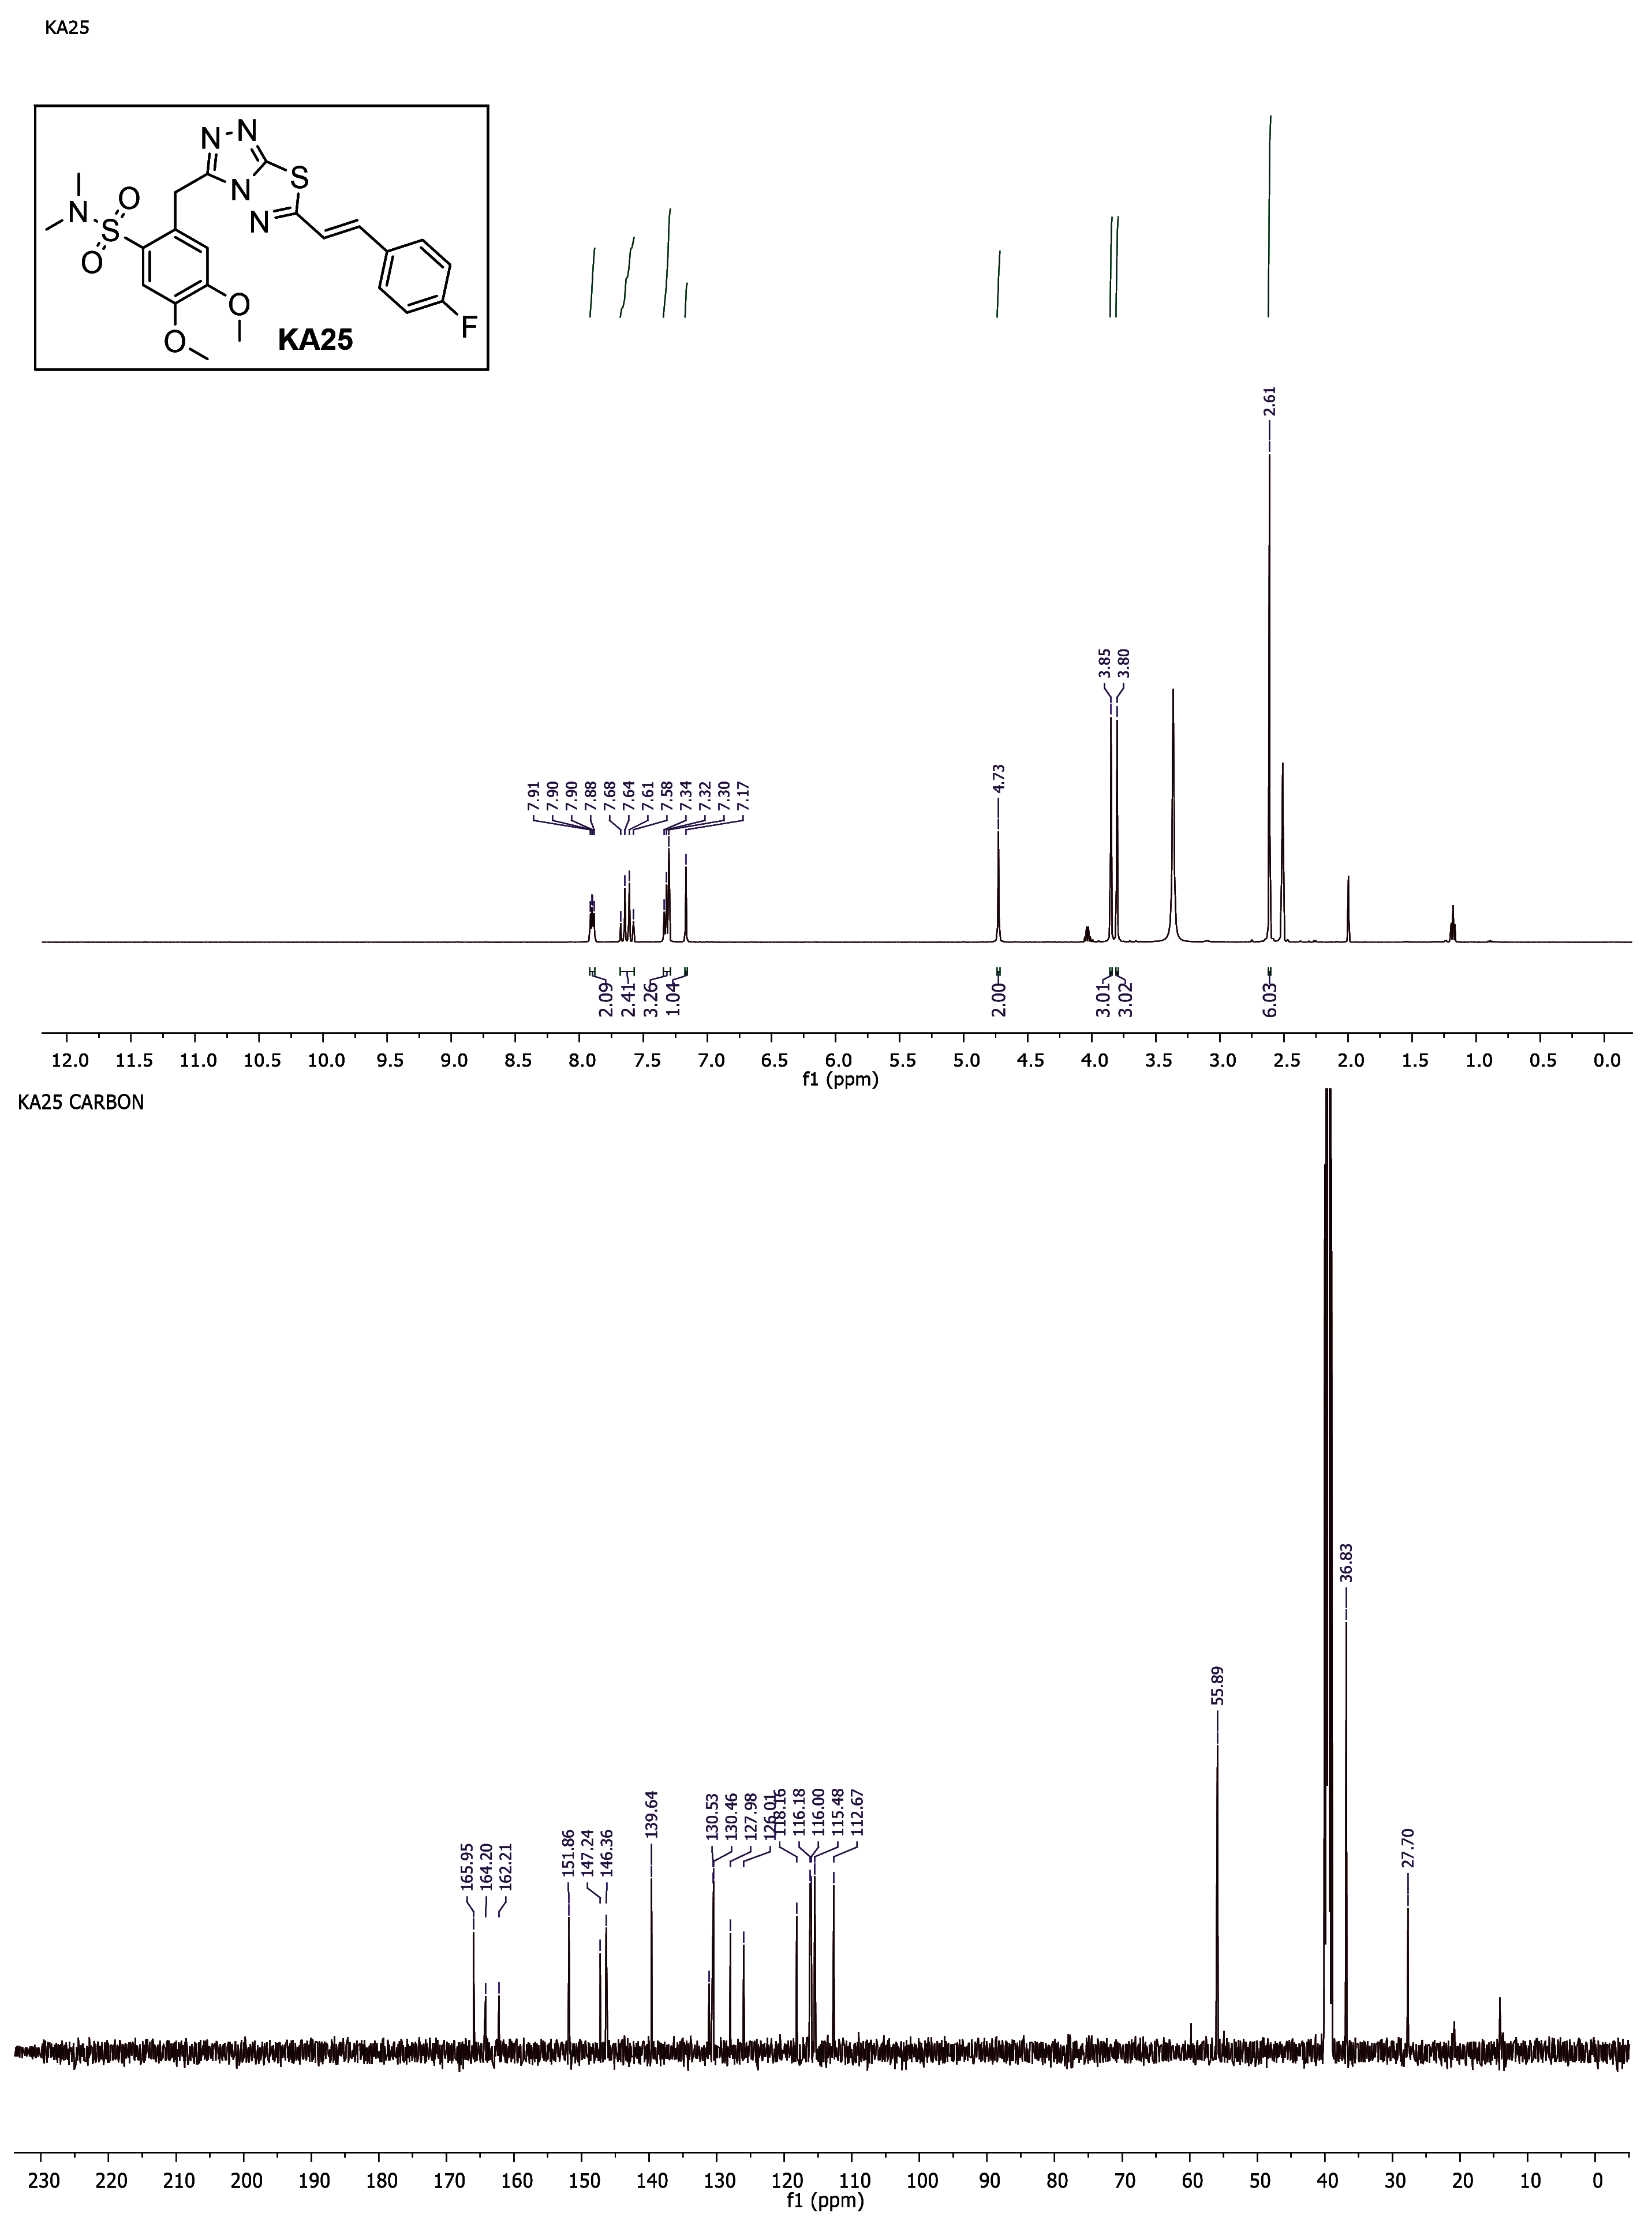


**Figure S14.** 1H-NMR and 13C-NMR spectra forcompound **KA25.**


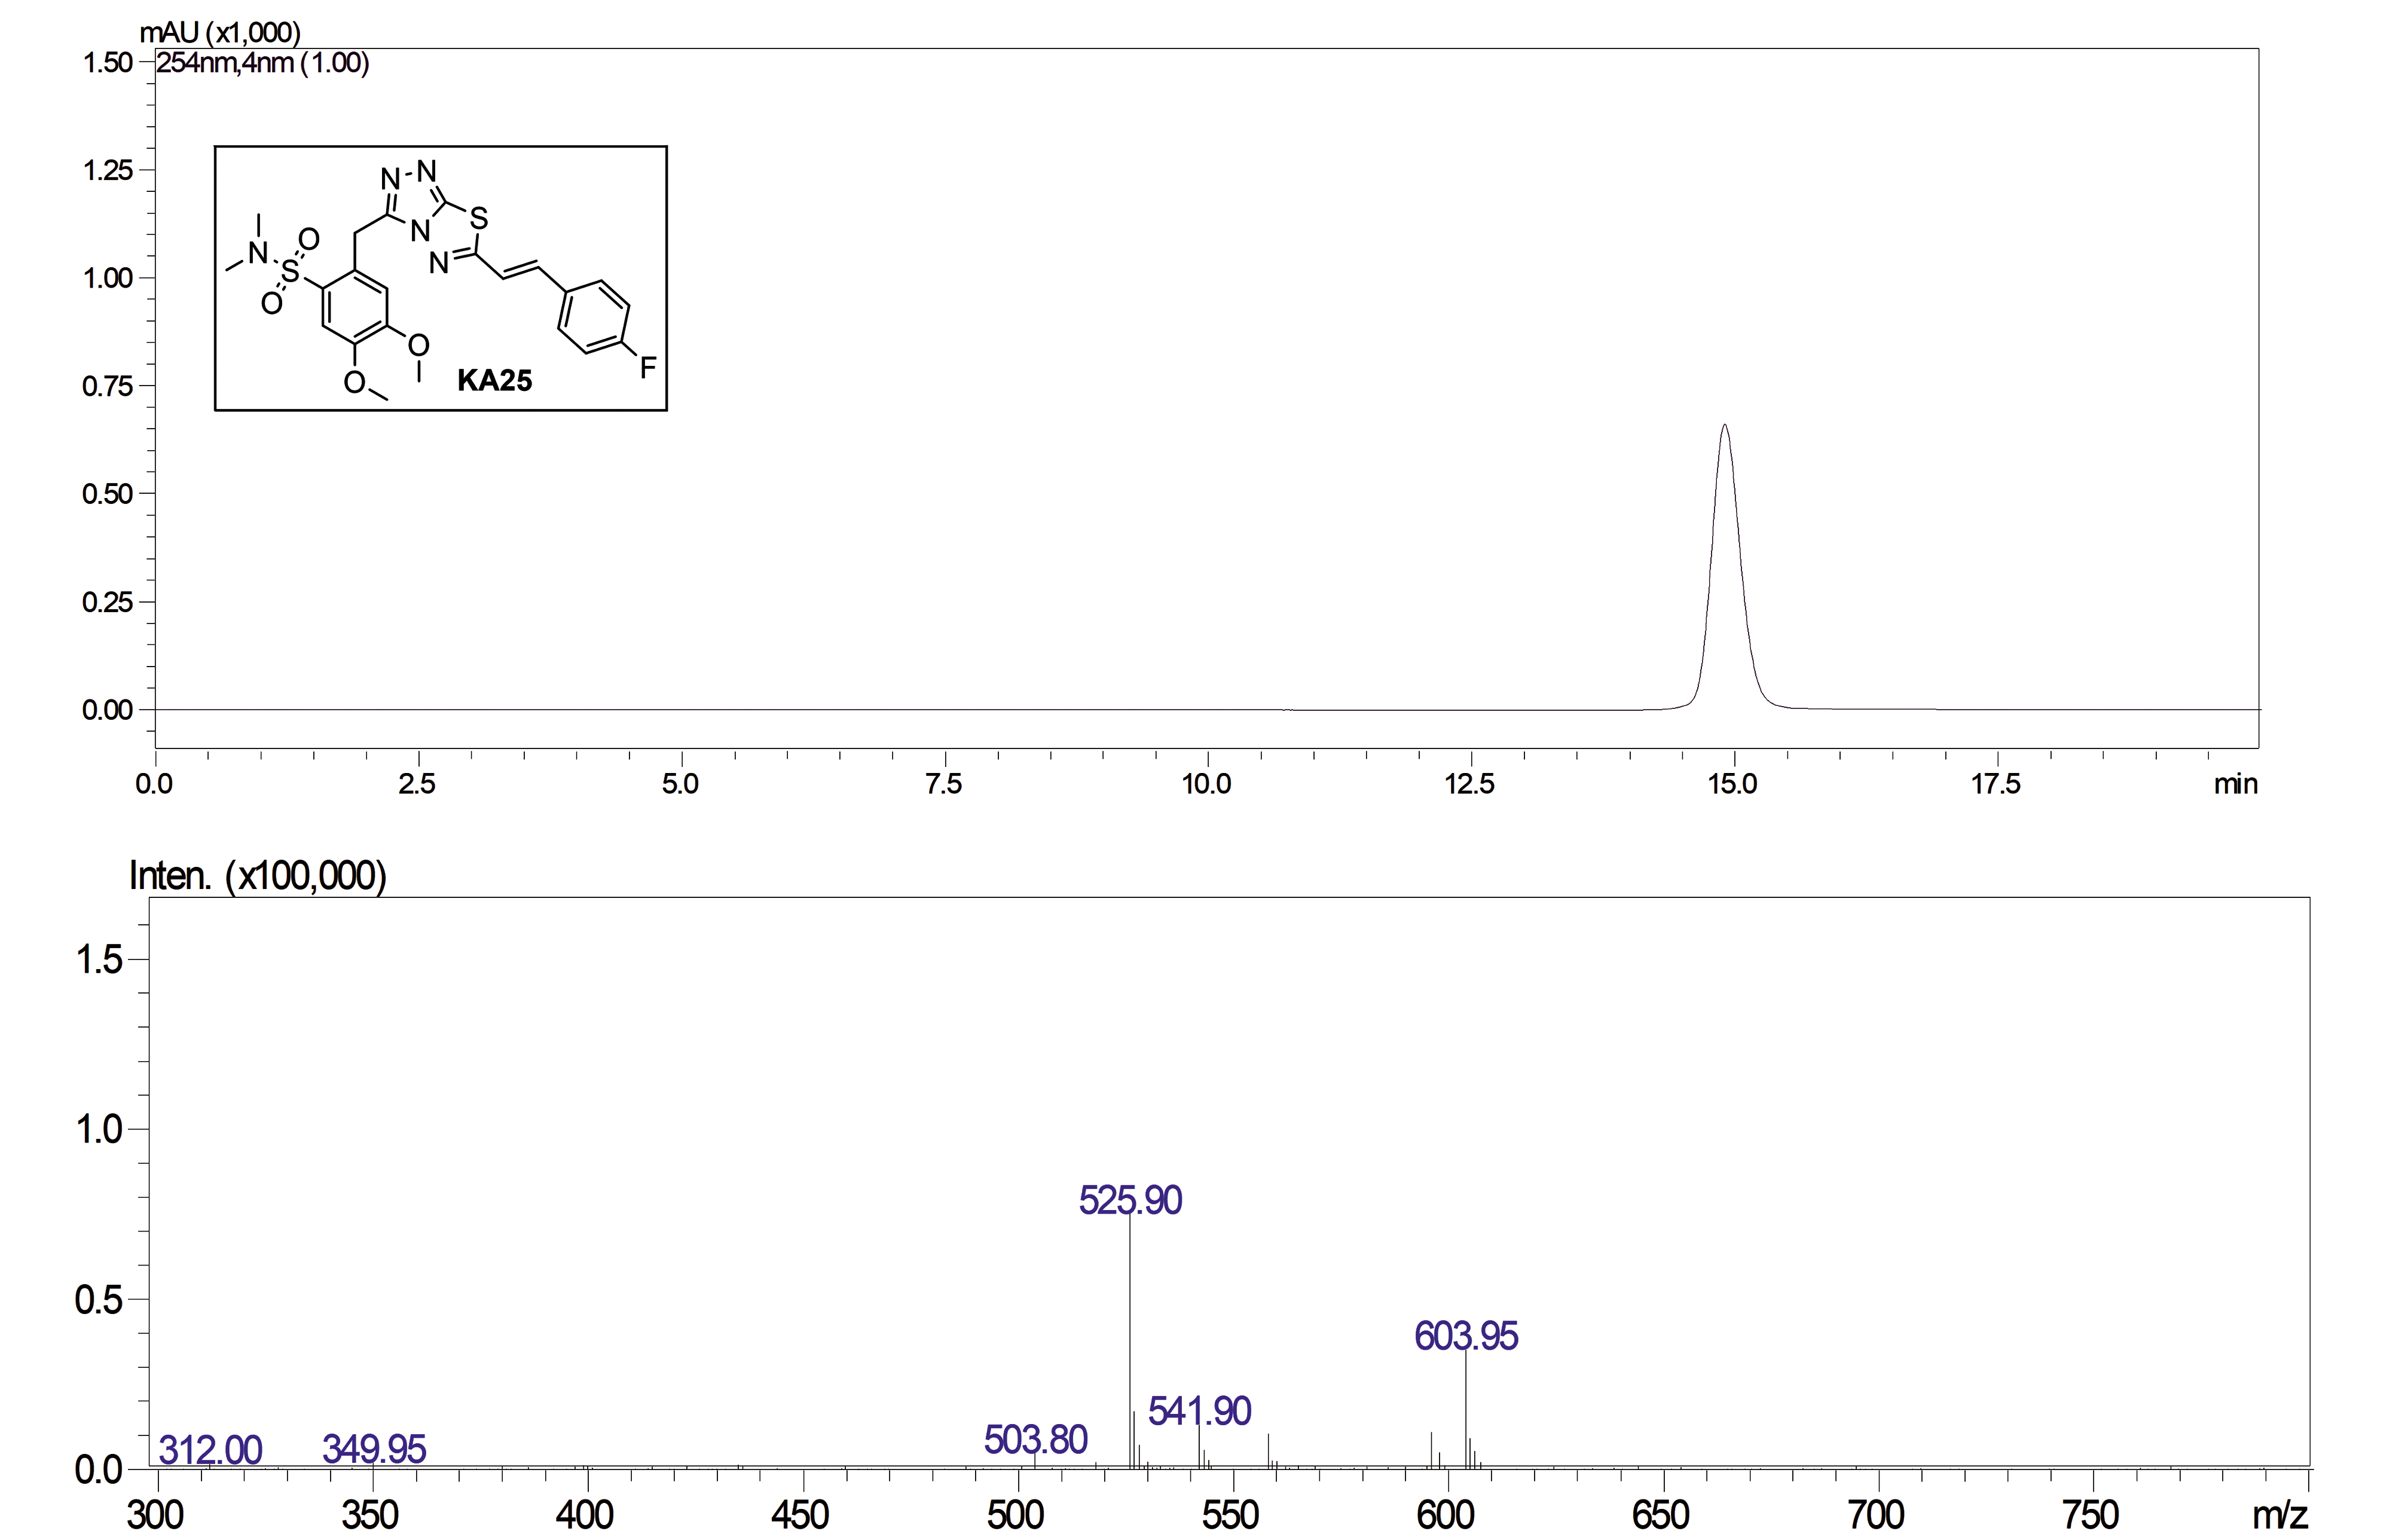


**Figure S15.**LC/ESI-MS analysis forcompound **KA25.** ESI-MS, positive mode: m/z calcd mass for C22H22FN5NaO4S2 [M+Na]+= 526.10, was found 525.90. Analytical method for LC-MS: LC-20AD Shimadzu connected to Shimadzu LCMS-2010EV; Mobile Phase: methanol; LC isocratic; HPLC column: SUPELCO Discovery C18, 25cm x 4.6mm, 5μm; Flow rate: 0.4 mL/min; Column temperature: 26 °C; UV detector: 254 nm; MS detector: 1.65K; Run time: 20 min; Retention time: 15 min.
